# A collaborative resource platform for non-human primate neuroimaging

Adam Messinger<sup>a</sup>, Nikoloz Sirmipilatzé<sup>b,c</sup>, Katja Heuer<sup>d,e</sup>, Kep Kee Loh<sup>f,g</sup>, Rogier B. Mars<sup>h,i</sup>, Julien Sein<sup>f</sup>, Ting Xu<sup>j</sup>, Daniel Glen<sup>k</sup>, Benjamin Jung<sup>a,l</sup>, Jakob Seidlitz<sup>m,n</sup>, Paul Taylor<sup>k</sup>, Roberto Toro<sup>e,o</sup>, Eduardo A. Garza-Villarreal<sup>p</sup>, Caleb Sponheim<sup>q</sup>, Xindi Wang<sup>r</sup>, R. Austin Benn<sup>s</sup>, Bastien Cagna<sup>f</sup>, Rakshit Dadarwal<sup>b,c</sup>, Henry C. Evrard<sup>t,u,v,w</sup>, Pamela Garcia-Saldivar<sup>p</sup>, Steven Giavasis<sup>j</sup>, Renée Hartig<sup>i,u,x</sup>, Claude Lepage<sup>f</sup>, Cironq Liu<sup>y</sup>, Piotr Majka<sup>z,aa,bb</sup>, Hugo Merchant<sup>p</sup>, Michael P. Milham<sup>j,v</sup>, Marcello G.P. Rosa<sup>aa,bb</sup>, Jordy Tasserie<sup>cc,dd,ee</sup>, Lynn Uhrig<sup>cc,dd</sup>, Daniel S. Margulies<sup>ff</sup>, and P. Christiaan Klink<sup>gg,\*</sup>

## Author affiliations

<sup>a</sup> Laboratory of Brain and Cognition, National Institute of Mental Health, Bethesda, USA

<sup>b</sup> German Primate Center – Leibniz Institute for Primate Research, Kellnerweg 4, 37077 Göttingen, Germany

<sup>c</sup> Georg-August-University Göttingen, 37073 Göttingen, Germany

<sup>d</sup> Max Planck Institute for Human Cognitive and Brain Sciences, Leipzig, Germany

<sup>e</sup> Center for Research and Interdisciplinarity (CRI), INSERM U1284, Université de Paris, Paris, France

<sup>f</sup> Institut de Neurosciences de la Timone (INT), Aix-Marseille Université, CNRS, UMR 7289, 13005 Marseille, France

<sup>g</sup> Institute for Language, Communication, and the Brain, Aix-Marseille University, Marseille, France

<sup>h</sup> Wellcome Centre for Integrative Neuroimaging, Nuffield Department of Clinical Neurosciences, John Radcliffe Hospital, University of Oxford, Oxford OX3 9DU, UK

<sup>i</sup> Donders Institute for Brain, Cognition, and Behaviour, Radboud University Nijmegen, Montessorilaan 3, 6525 HR Nijmegen, The Netherlands

<sup>j</sup> Child Mind Institute, 101 E 56th St, New York, NY 10022, USA

<sup>k</sup> Scientific and Statistical Computing Core, National Institute of Mental Health, Bethesda, USA

<sup>l</sup> Department of Neuroscience, Brown University, Providence RI USA

<sup>m</sup> Department of Child and Adolescent Psychiatry and Behavioral Science, Children's Hospital of Philadelphia, Philadelphia PA USA

<sup>n</sup> Department of Psychiatry, University of Pennsylvania, Philadelphia PA USA

<sup>o</sup> Department of Neuroscience, Institut Pasteur, UMR 3571 CNRS, Université de Paris, Paris, France

<sup>p</sup> Instituto de Neurobiología, Universidad Nacional Autónoma de México campus Juriquilla, Queretaro, Mexico

<sup>q</sup> Department of Organismal Biology and Anatomy, University of Chicago, Chicago IL USA

<sup>r</sup> McGill Centre for Integrative Neuroscience, Montreal Neurological Institute (MNI), Quebec, Canada

<sup>s</sup> Centro Nacional de Investigaciones Cardiovasculares Carlos III (CNIC), Madrid, Spain

<sup>t</sup> Centre for Integrative Neurosciences, University of Tübingen, Tübingen, Germany

<sup>u</sup> Max Planck Institute for Biological Cybernetics, Tübingen, Germany

<sup>v</sup> Nathan S. Kline Institute for Psychiatric Research, Orangeburg, New York, USA

<sup>w</sup> International Center for Primate Brain Research, Chinese Academy of Science, Shanghai, PRC

<sup>x</sup> Focus Program Translational Neurosciences, University Medical Center, Mainz, Germany

<sup>y</sup> Department of Neurobiology, University of Pittsburgh Brain Institute, Pittsburgh PA, USA

<sup>z</sup> Laboratory of Neuroinformatics, Nencki Institute of Experimental Biology of the Polish Academy of Sciences, 02-093 Warsaw, Poland

<sup>aa</sup> Australian Research Council, Centre of Excellence for Integrative Brain Function, Monash University Node, Clayton, VIC 3800, Australia

<sup>bb</sup> Biomedicine Discovery Institute and Department of Physiology, Monash University, Clayton, VIC 3800, Australia

<sup>cc</sup> Commissariat à l'Énergie Atomique et aux Énergies Alternatives, Direction de la Recherche Fondamentale, NeuroSpin Center, Gif-sur-Yvette, France

<sup>dd</sup> Cognitive Neuroimaging Unit, Institut National de la Santé et de la Recherche Médicale U992, Gif-sur-Yvette, France

<sup>ee</sup> Université Paris-Saclay, France

<sup>ff</sup> Integrative Neuroscience and Cognition Center, Centre National de la Recherche Scientifique (CNRS) UMR 8002, Paris, France

<sup>gg</sup> Department of Vision & Cognition, Netherlands Institute for Neuroscience, Amsterdam, The Netherlands

### **\*Correspondence**

P. Christiaan Klink

[c.klink@nin.knaw.nl](mailto:c.klink@nin.knaw.nl)

Netherlands Institute for Neuroscience

Meibergdreef 47, 1105 BA Amsterdam

The Netherlands

## 1 **Abstract**

2 Neuroimaging non-human primates (NHPs) is a growing, yet highly specialized field of  
3 neuroscience. Resources that were primarily developed for human neuroimaging often need to  
4 be significantly adapted for use with NHPs or other animals, which has led to an abundance of  
5 custom, in-house solutions. In recent years, the global NHP neuroimaging community has made  
6 significant efforts to transform the field towards more open and collaborative practices. Here we  
7 present the PRIMatE Resource Exchange (PRIME-RE), a new collaborative online platform for  
8 NHP neuroimaging. PRIME-RE is a dynamic community-driven hub for the exchange of practical  
9 knowledge, specialized analytical tools, and open data repositories, specifically related to NHP  
10 neuroimaging. PRIME-RE caters to both researchers and developers who are either new to the  
11 field, looking to stay abreast of the latest developments, or seeking to collaboratively advance the  
12 field.

13

14

## 15 **Keywords**

16 Open science; Resource sharing; Toolbox; Pipeline; Structural; Functional; Diffusion

17

18

## 19 **Highlights**

- 20
- 21 ● PRIME-RE is a bottom-up open science platform for non-human primate neuroimaging.
  - 22 ● The website hosts a wiki and info about analytical tools and open data repositories.
  - 23 ● Specialized tools address structural, functional & diffusion-weighted analysis.
  - 24 ● Multiple templates & atlases for several non-human primate species are highlighted.
  - 25 ● Communication channels facilitate international conversation and collaboration

26

27

28 **Conflict of interest:** The authors declare no conflict of interest.

29

30

31

## 31 **1. Introduction**

32 When navigating an unfamiliar city, people orient themselves based on a few landmarks, use a  
33 map for detailed navigation, and take advice from locals and previous visitors about where to go  
34 and which areas to avoid. Navigating a highly specialized research field, such as non-human  
35 primate (NHP) neuroimaging, is conceptually very similar. In order to orient, access to basic  
36 information and support from knowledgeable peers is invaluable. Here we present the **PRIMatE**  
37 **Resource Exchange** (PRIME-RE, <https://prime-re.github.io>), a new community-driven platform  
38 that promotes communication among peers and facilitates the exchange of specialized knowledge  
39 and resources related to NHP neuroimaging.

40 Translational neuroimaging in animals bridges the gap between non-invasive imaging studies in  
41 humans and invasive neural recordings that are only carried out in animal models (and  
42 occasionally in neurosurgical patients). The approach is pivotal for our understanding of the  
43 neuronal basis of neuroimaging signals (Logothetis, 2003; Logothetis et al., 2001; Logothetis and  
44 Wandell, 2004), guides the selection of recording targets for invasive studies, and reveals the  
45 broader brain networks involved in particular cognitive functions or brain processes. Cross-  
46 species comparison of neuroimaging results can furthermore provide insight into the evolution of  
47 the brain and its capabilities (Friedrich et al., this issue; Heuer et al., 2019). Finally, combining  
48 neuroimaging in animals with invasive methods that influence neuronal activity makes it possible  
49 to draw causal inferences about brain function and test potential human therapies (Klink et al.,  
50 this issue).

51 The NHP brain is similar to that of humans in many respects. Due to the evolutionary proximity of  
52 NHPs to humans, their ability to perform complex cognitive tasks, and the vast body of existing  
53 neuronal knowledge from invasive NHP studies, NHP neuroimaging is a crucial branch of  
54 translational imaging (Chen et al., 2012; Farivar and Vanduffel, 2014; Logothetis et al., 1999).  
55 However, the standard hardware and software used in human neuroimaging is generally not  
56 directly suitable for NHP neuroimaging, which requires highly specialized approaches. As a result,  
57 most research groups have developed their own in-house solutions that often require substantial  
58 further development for compatibility with other sites. These custom solutions often remain in-  
59 house and lack extensive documentation, which is far from ideal for peer review, collaboration,  
60 best practices, and reproducible science. In recent years, the international NHP neuroimaging  
61 community has begun embracing a culture of data-sharing, open science, and collaboration.  
62 These efforts led to the PRIMatE neuroimaging Data Exchange initiative (Milham et al., 2018), a

63 global workshop to discuss strategies for the future of the field (Milham et al., 2020), and this  
64 special issue of NeuroImage on NHP neuroimaging.

65 Once NHP neuroimaging data are collected or shared, a new set of challenges presents itself.  
66 Most neuroimaging software packages have been developed for use in humans and cannot be  
67 easily applied to NHP data due to built-in assumptions, such as a larger field-of-view,  
68 standardized voxel size, or a higher contrast between gray and white matter. The large number  
69 of choices involved in neuroimaging data analysis is a hotly-debated issue in human  
70 neuroimaging (Botvinik-Nezer et al., 2020). For NHP neuroimaging, these issues may be even  
71 more pressing due to the custom-solutions that are often required to make existing software  
72 compatible with NHP data. The field of human neuroimaging has started to address these issues  
73 with initiatives for standardized, reproducible analysis pipelines (BIDS, Nipype, etc) (Gorgolewski  
74 et al., 2011, 2016), data sharing (OpenfMRI, Zenodo, Neurovault, etc) (Gorgolewski et al., 2015;  
75 Poldrack et al., 2013), and collaborative and open coding (GitHub, GitLab, etc). NHP  
76 neuroimaging has been lagging behind in adopting such collaborative open science initiatives,  
77 but people's willingness to share and be open about the resource solutions they developed is  
78 steadily increasing (Balbastre et al., 2017; Tasserie et al., 2020) and new developments in  
79 information technology promote these initiatives, while creating avenues to assign explicit credit  
80 to developers. The global NHP neuroimaging consortium (Milham et al., 2020, 2018) aims to  
81 facilitate this progress with the introduction and curation of the **PRIMatE Resource Exchange**  
82 (PRIME-RE, <https://prime-re.github.io>), a community-driven online platform for the exchange of  
83 knowledge and resources concerning the acquisition, analysis, and visualization of NHP  
84 neuroimaging data.

85 PRIME-RE acts as an open hub where researchers from all countries and career stages can find  
86 and contribute information and resources related to the challenges and advantages of NHP  
87 neuroimaging. Dynamic collections of software tools are grouped by analysis-category to provide  
88 an overview of existing solutions to common challenges. Links to communication outlets allow  
89 researchers to meet international colleagues, discuss challenges and solutions, and start new  
90 collaborations. Resources are maintained by their respective developers, with PRIME-RE serving  
91 as an evolving access point with descriptions of the tools, their software requirements, a list of  
92 authors, relevant citations, and links to the tools themselves.

## 93 **2. Methods**

94 This Methods section will offer a brief description of the main structure of the PRIME-RE platform,  
95 including its main components, methods for people to contribute and interact, and possibilities for  
96 future growth. The lightweight PRIME-RE website (<https://prime-re.github.io/>) is intended to be  
97 dynamic and continuously evolve based on input from the research community. It can serve both  
98 as a starting point for researchers that are new to the field of NHP neuroimaging and as a meeting  
99 ground for more experienced researchers in the field. This initiative emerged from the Global  
100 Collaborative Workshop 2019 of the PRIME-DE consortium and subsequent BrainHack (Milham  
101 et al., 2020) and has since attracted a critical mass of active contributors dedicated to open and  
102 collaborative NHP neuroimaging. The platform is hosted on GitHub, which greatly facilitates  
103 community-driven contributions while also maintaining a complete version history of its content  
104 and evolution.

105 Content-wise, PRIME-RE does not aim to host, curate and maintain all available tools and  
106 documentation regarding NHP neuroimaging. Instead, it chooses an agile approach with  
107 standardized listings of resources, categorized by the type of challenge they address. These  
108 listings include a brief description, developer contact information, and a link to the developer-  
109 maintained resource. This model furthermore ensures that the most recent version of a resource  
110 will be found at its source and that developers receive credit for their efforts. The standardized  
111 listings also make it easy for developers to submit their resource for inclusion on PRIME-RE  
112 through a pre-formatted submission form in which they answer a few basic questions about their  
113 resource (Table 1). These answers form the basis of a resource's listing on PRIME-RE. If the  
114 developers are already hosting their resource online, a submission to PRIME-RE can be  
115 completed in a few minutes.

116 Submissions to PRIME-RE are approved for inclusion through community-driven evaluation.  
117 Once a submission form is submitted, a member of the community with access to PRIME-RE's  
118 backend can opt to include it on the website. It is up to the community to evaluate a resource's  
119 usefulness. A simple community support rating system has been implemented to allow anyone to  
120 express support for a resource by 'liking' it. This system could help the users of PRIME-RE to  
121 navigate the collection of resources and find tools that have accumulated a lot of community  
122 support. If concerns arise, they can be discussed through any of the offered communication  
123 channels. Direct community discussions are available through a dedicated "prime-re" chat-  
124 channel on the Brainhack Mattermost server (<https://mattermost.brainhack.org/brainhack/>)

125 channels/prime-re), and more conventional mailing-list or forum style discussion is available using  
126 the Neurostars forum (<https://neurostars.org>) with the tag "prime-re". The Neurostars forum is  
127 hosted by the International Neuroinformatics Coordinating Facility (INCF) and already has a broad  
128 user-base of neuroscience researchers. It is also possible to submit a contact form with  
129 comments, questions, or suggestions directly to PRIME-RE's backend, and often also to  
130 individual developers of a resource through their provided communication information. To  
131 facilitate collaboration among its users, PRIME-RE also partners with the BrainWeb initiative  
132 (<https://brain-web.github.io>).

133

|                      |                                                                                                                                       |
|----------------------|---------------------------------------------------------------------------------------------------------------------------------------|
| <b>Name</b>          | <i>Name of the resource</i>                                                                                                           |
| <b>Authors</b>       | <i>Names of the developers or authors</i>                                                                                             |
| <b>Description</b>   | <i>A brief description of the resource. What challenge was it developed for? What does it do?</i>                                     |
| <b>Documentation</b> | <i>Provide a link to more extensive (external) documentation, e.g. on the developers' website.</i>                                    |
| <b>Link</b>          | <i>Where can the resource be found or downloaded?</i>                                                                                 |
| <b>Language</b>      | <i>What kind of programming languages are used and/or required to use this tool?</i>                                                  |
| <b>Publication</b>   | <i>If there is a publication associated with this resource you can mention it here.</i>                                               |
| <b>Communication</b> | <i>How can (potential) users contact developers?</i>                                                                                  |
| <b>Restrictions</b>  | <i>Are there any restrictions for using this resource? Does it only work on certain systems? Are users obliged to cite something?</i> |
| <b>Category</b>      | <i>What would be the most suitable place on PRIME-RE to list this resource?</i>                                                       |

134

135 **Table 1.** Standardized information table for the submission of a resource for inclusion on PRIME-RE. When developers  
136 click a 'Contribute' button they are taken to a pre-formatted form where they can provide this information. Any member  
137 of the community with access to the website's backend can then include the new resource under the correct website  
138 category. In addition to this table, the submission form also has checkboxes with which the submitter can confirm that  
139 resource development occurred in accordance with all applicable directives and guidelines.

140

141 At the moment, PRIME-RE has two main components, 1) the primary website with categorized  
142 resource listings, and 2) an evolving wiki to document the challenges and best practices of NHP  
143 imaging. The categories that are currently listed on the PRIME-RE website are: 1) Templates and  
144 atlases; 2) Pipelines; 3) Data sharing; and 4) Software packages. The Pipelines section is further

145 subdivided into tools related to structural, functional, diffusion, and general NHP neuroimaging  
146 analysis. The results section of this paper will present an overview of some of the tools listed  
147 under these categories and subcategories at the time of writing. The Software Packages section  
148 contains a list of commonly used neuroimaging packages that were not specifically developed for  
149 NHP neuroimaging. Many of the specialized tools under the Pipeline sections integrate with some  
150 of these packages or employ some of their subfunctions. The main website also provides links to  
151 the above-mentioned communication channels and to the wiki. The wiki contains a primer on NHP  
152 neuroimaging that documents common challenges and potential solutions. It has its own version  
153 controlled back-end and is currently open for contributions for anyone with a GitHub account.  
154 While the current wiki already constitutes a team effort, the document is presented as a starting  
155 point that could potentially evolve into a ‘best practices’ guide with dynamic involvement of the  
156 broader NHP neuroimaging community.

157 Most of the tools that are currently listed on PRIME-RE were developed for macaque  
158 neuroimaging, but the platform aims to be an inclusive place where resources for all non-human  
159 primate species can be found. Several tools for marmoset neuroimaging are already listed, but  
160 the species diversity is likely to further increase as PRIME-RE evolves.

161

### 162 **3. Results**

163 The first version of the PRIME-RE platform went live in November 2019. It currently describes  
164 over 30 custom resources from contributors all over the world and houses an extensive primer on  
165 NHP neuroimaging in the form of a wiki with references to the resources listed on PRIME-RE. It  
166 also provides a comprehensive overview of neuroimaging tools that are not necessarily tailored  
167 towards NHP neuroimaging (although some of these packages do offer built-in solutions to  
168 facilitate working with non-human data). Here, we will present a synopsis of the wiki document  
169 (<https://github.com/PRIME-RE/prime-re.github.io/wiki>) and an overview of some of the  
170 specialized resources that are part of PRIME-RE at this time.

171

#### 172 *3.1. The wiki: A primer on NHP-MRI*

173 The wiki-pages start with sections that address the various motivations for NHP neuroimaging  
174 and some of the common challenges encountered in data collection (Farivar and Vanduffel,



175 2014). These sections include study preparation issues, such as obtaining ethical approval for  
176 your study, responsible animal housing, handling, surgery, and transportation. The choice of coil  
177 type is discussed and the consequences of using custom coils are clearly explained. Other  
178 discussed challenges in data acquisition include non-standard body orientations, subject motion,  
179 the use of anesthesia or contrast agents, variable fields-of-view, and a reduced signal-to-noise-  
180 ratio (SNR) as a result of having to scan small NHP brains at higher resolution than human brains  
181 at the same magnetic field strength.

182 The next section briefly addresses the topic of data organization. Standardization efforts in human  
183 neuroimaging have yielded the Brain Imaging Data Structure (BIDS) standard, a widely adopted  
184 file-naming and data-structure convention that facilitates data and resource sharing. Whereas a  
185 range of tools on PRIME-RE understand data in BIDS format, the compatibility of NHP data with  
186 the BIDS structure is not perfect, again due to some unique challenges in NHP neuroimaging that  
187 are not present in human neuroimaging. There are, however, ongoing efforts to either expand the  
188 BIDS format so that it can better incorporate the idiosyncrasies of NHP data, or create a derivative  
189 NHP version that fulfills specific requirements to this research field.

190 The remainder of the wiki largely follows the categories that are also used in PRIME-RE's  
191 resource listings. There are separate sections for structural, functional, and diffusion data  
192 processing. The section on structural data processing includes data processing steps, such as  
193 orientation correction, de-obliqueing, cropping, denoising and averaging multiple volumes or  
194 images. It lists several options to handle bias-correction, brain extraction (skull-stripping), and  
195 segmentation. It also links to several pipelines available from PRIME-RE that offer more or less  
196 complete solutions to a range of these issues.

197 The section on functional data processing points out that this step is in fact not that different from  
198 human neuroimaging since the same types of statistical models can be applied to different  
199 species. One major difference that does exist is the extent to which data need to be pre-  
200 processed. NHP data, especially data from awake NHP neuroimaging studies, tend to require a  
201 lot more motion and distortion correction than the typical human dataset. The section on diffusion-  
202 weighted imaging discusses the differences between *in vivo* and *post-mortem* (*ex vivo*) diffusion  
203 MRI and their consequences for data analysis. Several caveats and solutions for tractography in  
204 NHPs are also laid out.

205 The wiki ends with a section on cross-species comparison. While challenging, this is also one of  
206 the most powerful uses of NHP neuroimaging since it has the potential to yield important

207 translational or evolutionary insights. The section explains the recently developed common  
208 feature space approach (Mars et al., 2018a, 2018b), as well as comparisons based on activity  
209 dynamics (Mantini et al., 2012), and brain matching based on homologous sulci (Auzias et al.,  
210 2011). Several resources, suitable for the processing of NHP data, are suggested to implement  
211 these approaches.

212 The PRIME-RE wiki is not meant as a definitive guide to NHP neuroimaging, but rather as a  
213 community curated and dynamically updated collection of ‘best’ (or ‘optimal’) practices.  
214 Improvements and additions from the community are highly encouraged.

215

### 216 *3.2. PRIME-RE Resources*

217 The resources that are currently listed on PRIME-RE are divided into a number of categories  
218 based on their general purpose. Below we highlight these categories and a selection of tools from  
219 each. Please consult the website for a complete and up-to-date overview of the available  
220 resources (<https://prime-re.github.io/resources>). All resources listed on PRIME-RE, including  
221 those described here, were developed and assessed with datasets collected in accordance with  
222 locally approved guides and legislation concerning animal wellbeing, including the NIH Guide for  
223 Care and Use of Laboratory Animals, the U.K. Animals (Scientific Procedures) Act, 1986,  
224 European Directive 2010/63/EU, and the Australian Code for the Care and Use of Animals for  
225 Scientific Purposes.

226

#### 227 *3.2.1. Templates & Atlases*

228 Alignment of an individual’s (f)MRI data to a standard template space provides several  
229 advantages. Firstly, it provides a detailed anatomical image for evaluating and presenting  
230 functional results or other maps. Secondly, it presents a standard orientation and coordinate  
231 system for reporting findings, comparing results across subjects and labs, and aligning data for  
232 group analysis. Thirdly, templates frequently include ancillary datasets such as brainmasks, tissue  
233 segmentation masks, anatomical atlases, surfaces, morphometry, and data from other modalities  
234 that put a variety of analysis tools at the user’s disposal. These resources can eliminate time-  
235 consuming manual processing and encourage the use of consistent and reproducible processing  
236 streams. For example, a brainmask can be used for template-based brain extraction in the

237 subject's space or an atlas can be used for a region of interest (ROI) analysis in the template or  
238 subject space.

239 The choice and adoption of a standard template space is becoming especially relevant now that  
240 data sharing initiatives make it much more feasible to obtain larger sample sizes. For human  
241 (f)MRI, the MNI152 template (Fonov et al., 2011) provides a widely adopted standard volumetric  
242 space, while the fsaverage (Freesurfer average) (Fischl, 2012) template is a popular standard  
243 space for surface-based analysis. For non-human primate (NHP) MRI, there are a variety of  
244 templates. PRIME-RE currently lists several macaque and marmoset templates, as well as a  
245 mouse lemur template. In addition to species, templates differ with regard to imaging modality, *in*  
246 *vivo* versus *ex vivo* scanning, single subject versus population average, field strength, resolution,  
247 etcetera. For the rhesus macaque, the NIMH Macaque Template (NMT) has been widely adopted  
248 and has been incorporated in a number of the resources on PRIME-RE (Seidlitz et al., 2018). An  
249 updated version of this *in vivo* population template (NMT v2) is presented in this special issue and  
250 described below (Jung et al., this issue). The NMT v2 and its associated average surface (see  
251 Section 3.2.2.5.1), together with their tissue segmentations and atlases, constitute a complete set  
252 of complementary volumetric and surface spaces for representing macaque data.

253 Two novel macaque atlases are presented in this special issue and detailed below. Both are  
254 defined on the NMT v2 and manually refined to this template. The first is an atlas of the cortex  
255 (CHARM, Jung et al., this issue) and the second is an atlas of the subcortex, covering the  
256 forebrain, midbrain, and hindbrain (Hartig et al., this issue). These complementary atlases are  
257 arranged hierarchically, describing regions at various levels of granularity. Though these atlases  
258 have been tailored to the NMT v2, they can be aligned to previous macaque templates already  
259 used by some labs, and atlases in those templates can similarly be aligned to the NMT v2. The  
260 RheMAP resource, which is described in the subsequent section on Structural MRI Tools (see  
261 Section 3.2.2.2.2), stores nonlinear alignment warps between various macaque anatomical  
262 templates to facilitate such conversions between template spaces (Klink and Sirmipilatzte, 2020;  
263 Sirmipilatzte and Klink, 2020).

264 Two marmoset resources are also included in PRIME-RE. The Marmoset Brain Mapping Project  
265 is a multimodal high-resolution template and atlas of the marmoset brain that includes white  
266 matter maps based on diffusion MRI data. The most recent version is a population template based  
267 on *in vivo* scans that includes surfaces (Liu et al., this issue). In addition, the Marmoset Brain  
268 Connectivity Atlas (Majka et al., this issue) provides a large collection of anatomical tracer data  
269 and histological material in an interactive platform, equipped with various analysis tools.

270 *3.2.1.1. NIMH Macaque Template (NMT v2) and Hierarchical Atlas of the Cortex (CHARM)*

271 *A macaque template in stereotaxic coordinates with a multi-scale cortical atlas.*

272 The National Institute of Mental Health (NIMH) Macaque Template (NMT) is an anatomical MRI  
273 template of the macaque brain that serves as a standardized space for macaque neuroimaging  
274 analysis (Seidlitz et al., 2018). The recently released NMT version 2 (Jung et al., this issue)  
275 provides a complete overhaul of the NMT, including a fully-symmetric template in stereotaxic  
276 orientation (i.e., in the Horsley-Clarke plane) (Horsley and Clarke, 1908). Coordinates in this  
277 stereotaxic space are measured from ear bar zero (i.e., the intersection of the midsagittal plane  
278 and a line through the interaural meatus). The adoption of stereotaxic orientation and coordinates  
279 will assist users with surgical planning and facilitates reporting of coordinates commensurate with  
280 those used with other techniques (e.g. electrophysiology, intracerebral injection).

281 The NMT was created by iteratively registering T1-weighted scans of 31 adult rhesus macaque  
282 brains to a working template, averaging the nonlinearly registered scans, and then applying the  
283 inverse transformations to bring the working template closer to the group average (Seidlitz et al.,  
284 2018). The symmetric NMT was generated through the same process except that each subject's  
285 anatomical was input twice, once in its true orientation and once mirrored about the midline.  
286 Modifications to the scan averaging and postprocessing have improved template contrast and  
287 spatial resolution. Brain masks, segmentations, and various other tissue masks are provided  
288 (Figure 1A-C). The availability of symmetric and asymmetric variants of the NMT v2 allows users  
289 to choose the version that best suits their analysis. Other template variants include an expanded  
290 full head field-of-view and a lower resolution version for faster processing (0.5 mm isotropic,  
291 down-sampled from 0.25 mm isotropic). Surfaces for NMT v2, generated using the new CIVET-  
292 Macaque platform (Lepage et al., this issue), are provided for easy data visualization. For surface-  
293 based group analysis, the NMT average surface, which comes with anatomical labels from the  
294 D99 and CHARM atlases, can serve as a surface-based registration target for representing  
295 cortical surfaces in a common framework regardless of the processing pipeline.

296 Atlases are an important aspect of group and ROI-based analyses. The NMT v2 package comes  
297 with multiple anatomical atlases that have been manually tailored to the template's morphology.  
298 These atlases include the D99 atlas (Reveley et al., 2017) and the new Cortical Hierarchy Atlas  
299 of the Rhesus Macaque (CHARM; Jung et al., this issue). The latter is a novel anatomical  
300 parcellation of the macaque cerebral cortex, where the cortical sheet is subdivided into six-levels  
301 of increasingly fine-grained parcellation (Figure 1D-F). The broadest level consists of the four  
302 cortical lobes and the finest level is based on the D99 atlas, with modifications that make the

303 regions more robust when applied to low resolution (e.g. fMRI) data. Different scales of CHARM  
304 can be combined so that, for example, a tracer injection or the seed region for a resting state  
305 analysis can be described using a fine scale, while the region's anatomical or functional  
306 connectivity can be succinctly described on a broader scale. This way, whole brain data can be  
307 characterized on a spatial scale that is most suitable to a study's findings. Users can also select  
308 a CHARM level *a priori* based on how many regions it contains, and thus control the required  
309 degree of multiple comparison correction for their analysis.

310 While the NMT v2 works with any neuroimaging platform that accepts NiftI/GifTI format, the  
311 template has been designed to have additional functionality within the AFNI ecosystem (Cox,  
312 1996). Enhancements include support for the *NMT2* standardized space, recognition of the NMT  
313 v2 in the @animal\_warper alignment pipeline (see section 3.2.2.4.2) and the functional  
314 processing pipeline generator afni\_proc.py (see section 3.2.3.1), and downloadable demos  
315 showing how AFNI can perform structural and functional analyses (task-based or resting state)  
316 using the NMT v2. See the accompanying article by Jung et al. (Jung et al., this issue) for further  
317 information.

318

### 319 *3.2.1.2. Subcortical Atlas of the Rhesus Macaque (SARM)*

320 *A complete MRI atlas of the macaque subcortex suited for neuroimaging.*

321 The Subcortical Atlas of the Rhesus Macaque (SARM) is an anatomical parcellation of the entire  
322 subcortex tailored for magnetic resonance imaging (MRI) (Hartig et al., this issue). The regions-  
323 of-interest (ROIs) are hierarchically organized, with grouping levels suited for both fine structural  
324 and spatially broader functional analyses. SARM aims to facilitate the identification, localization,  
325 and study of neural interactions involving subcortical regions of the brain.

326 A high-resolution structural MRI of an *ex vivo* rhesus monkey brain was segmented into 180  
327 anatomical ROIs by matching distinctly contrasted structures with their histological counterparts.  
328 ROIs followed the recently updated nomenclature and delineations of the Rhesus Monkey Brain  
329 in Stereotaxic Coordinates atlas (Paxinos et al., in preparation). The *ex vivo* MRI was nonlinearly  
330 registered to the symmetric population-level template of the rhesus macaque NMT v2 (see section  
331 3.2.1.1 and (Jung et al., this issue). The SARM was warped using Advanced Normalization Tools  
332 (ANTs; (Avants et al., 2008) and refined using AFNI (Cox, 1996). ROIs were delimited using the  
333 tissue segmentation masks for the NMT v2, smoothed by computing the mode over neighboring  
334 voxels, and individually refined by hand to match the average structural template. The SARM is

335 organized into 6 hierarchical levels. The finest level presents each individual ROI (Figure 1G),  
336 whereas the broadest level corresponds to developmental subdivisions (i.e., tel-, di-, mes-, met-,  
337 and myel-encephalon). The SARM was validated in 3 monkeys with a functional MRI (fMRI)  
338 paradigm known to activate the lateral geniculate nucleus (LGN) (Logothetis et al., 1999).

339 The SARM offers neuroimaging researchers a complete subcortical segmentation of the rhesus  
340 macaque brain. The atlas can be used for a range of structural and functional analyses and has  
341 been specifically tailored to work with the CHARM and NMT v2 (Jung et al., this issue). The SARM  
342 is also available to download via Zenodo, and has conveniently been incorporated with the atlases  
343 available in AFNI. Additional information is available in the accompanying article (Hartig et al.,  
344 this issue).

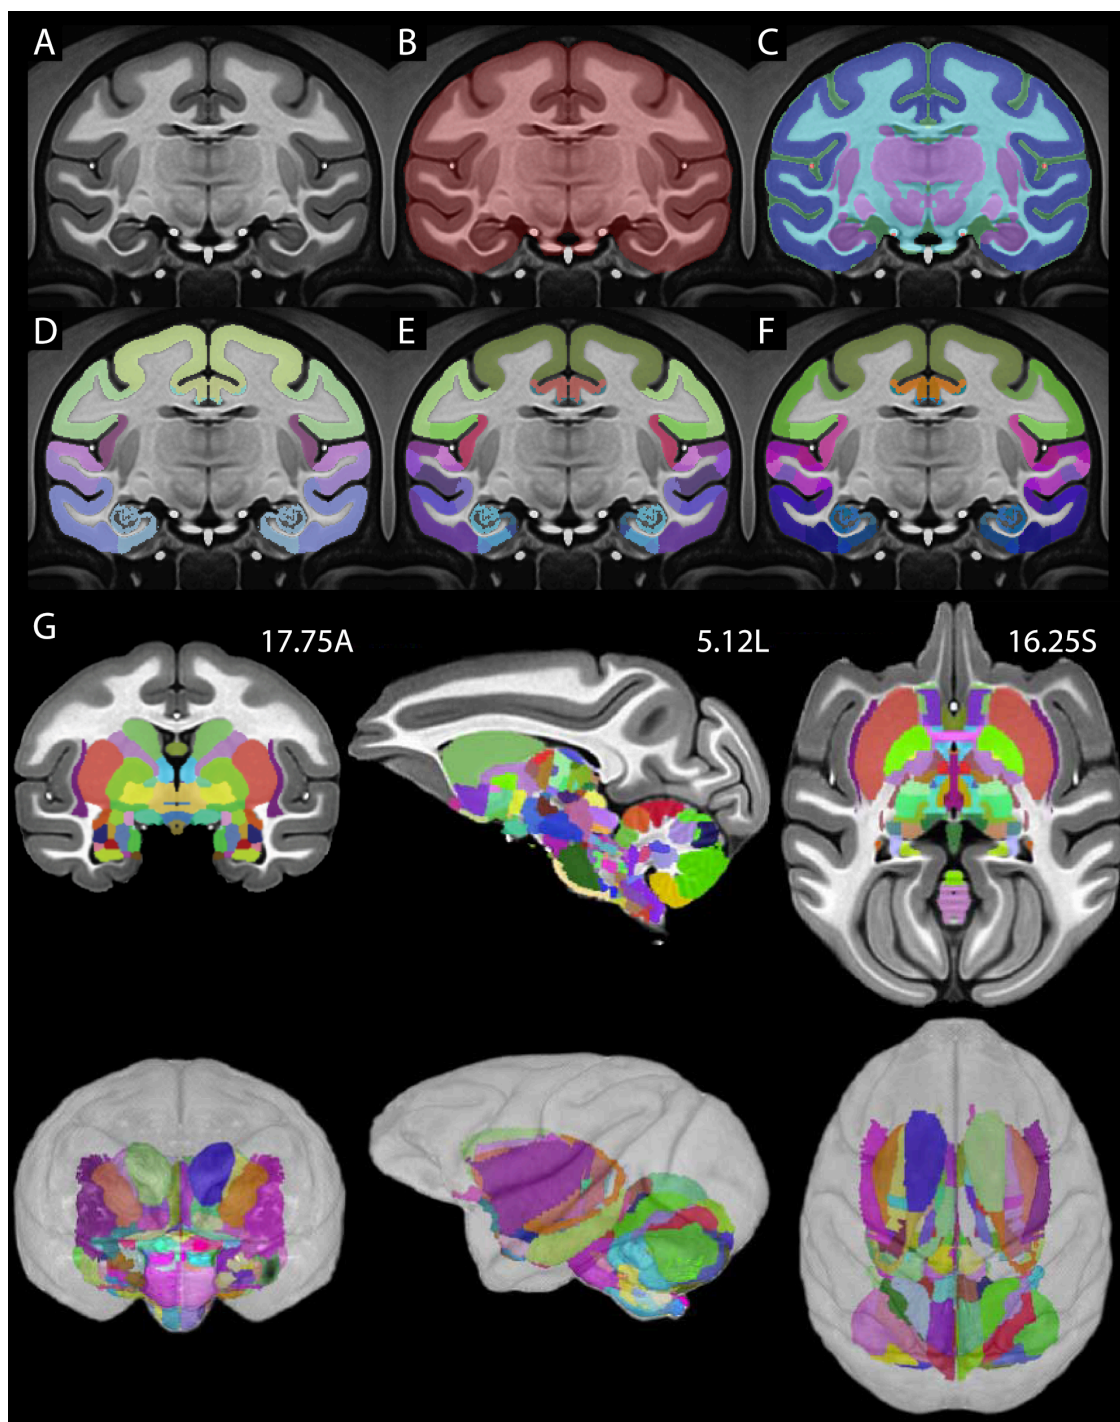

**Figure 1. Macaque Templates.** **A)** The NIMH Macaque Template v2 (NMT v2) comes in symmetric (shown here) and asymmetric variants, each with **B)** a manually refined brain mask, and **C)** 5-class tissue segmentations. **D-F)** Levels 2, 4, and 6 of the Cortical Hierarchy Atlas of the Rhesus Macaque (CHARM). **G)** The SARM in symmetric NMT v2 stereotaxic space. From left-to-right a representative sagittal, coronal and horizontal section is depicted with volumetric images (above) and corresponding surface views (below). Coordinates listed are in relation to the x(L), y(A), and z(S) dimensions.

346 3.2.1.3. *Marmoset Brain Mapping Project (MBM)*

347 *MRI-based marmoset brain atlases and tools for neuroimaging and connectome studies*

348 The Marmoset Brain Mapping Project ([www.marmosetbrainmapping.org](http://www.marmosetbrainmapping.org)) includes three atlases  
349 and templates:

350 1) Version 1 focuses on cortical parcellations (Liu et al., 2018). A 3D digital gray matter atlas was  
351 constructed from high-resolution (150  $\mu\text{m}$  isotropic) *ex vivo* MRI images, including magnetization  
352 transfer ratio (a T1-like contrast), T2w images, and multi-shell diffusion MRI (dMRI). Based on the  
353 multi-modal MRI contrasts, 54 cortical areas and 16 subcortical regions were manually delineated  
354 on one hemisphere of the brain using a data-driven approach that was developed to minimize  
355 manual drawing errors. The 54 cortical areas were then merged into 13 larger cortical regions  
356 according to their locations to yield a coarse version of the atlas, and also subdivided into 106  
357 regions using a dMRI connectivity-based parcellation method. A Paxinos-style cortical atlas  
358 (Majka et al., 2016) was fused and refined into the high-resolution MRI template to provide  
359 interoperability to other marmoset databases. The atlas set provides a readily usable multi-modal  
360 template space with multi-level anatomical labels that can facilitate various neuroimaging studies  
361 of marmosets.

362 2) Version 2 focuses on fine-detailed white matter pathways (Liu et al., 2020). In this version, *ex*-  
363 *vivo* MRI data of the marmoset brain was collected with the highest spatial resolution available to  
364 date, including 80  $\mu\text{m}$  and 64  $\mu\text{m}$  multi-shell dMRI, 80  $\mu\text{m}$  MTR, and 50  $\mu\text{m}$  T2w and T2\*w images.  
365 The data allowed building a fine-grained 3D white matter atlas, which depicts many fiber pathways  
366 that were either omitted or incorrectly described in previous MRI datasets or atlases of the primate  
367 brain. By combining dMRI tractography and neuronal tracing data (Majka et al., 2020), a detailed  
368 fiber pathway mapping of cortical connections is provided. The white matter atlas, fiber pathways  
369 maps and dMRI data, including both raw and processed data, are publicly available on the  
370 project's website (Figure 2A,B).

371 3) Version 3 focuses on population standard templates and cortical surfaces (Liu et al., this issue).  
372 While versions 1 and 2 were based on a few *ex vivo* brain samples, and lacked essential  
373 functionalities for *in vivo* studies of large animal cohorts, version 3 is based on *in vivo* population  
374 data. Standard templates are derived from multi-modal data of 27 marmosets, including multiple  
375 types of T1w and T2w contrast images, DTI contrasts, and large field-of-view MRI and CT images.  
376 Multi-atlas labeling of anatomical structures was performed on the new templates and highly  
377 accurate tissue-type segmentation maps were constructed to facilitate volumetric studies. Fully  
378 featured brain surfaces and cortical flat maps facilitate 3D visualization and surface-based



379 analyses with most surface analyzing tools. The population-based template will significantly aid a  
380 wide range of neuroimaging and connectome studies that involve across-subject analysis.

381

#### 382 *3.2.1.4. Marmoset Brain Connectivity Atlas*

383 *Marmoset anatomical tracer data and connectivity analysis tools integrated with an atlas and*  
384 *histological material.*

385 The Marmoset Brain Connectivity Atlas (Majka et al., 2020) allows exploration of a growing  
386 collection of data from retrograde tracer injections in the marmoset neocortex. At present, it  
387 includes data from over 140 experiments covering almost 50% of currently recognized areas of  
388 marmoset cortex, encompassing subdivisions of prefrontal, premotor, superior temporal, parietal,  
389 retrosplenial and occipital complexes. Data from different animals are presented against high-  
390 resolution images of the underlying histology, and registered to a template based on the Paxinos  
391 et al. (Paxinos et al., 2012) stereotaxic atlas using an algorithm guided by an expert delineation  
392 of histological borders. The portal (<http://www.marmosetbrain.org>) implements best practices  
393 in terms of sharing the connectivity data. The resource provides access to primary experimental  
394 results, as well as connectivity patterns that are quantified according to the currently accepted  
395 parcellation of the marmoset cortex. To enable graph-based network analyses, the portal  
396 incorporates tools for data exploration relative to cytoarchitectural areas  
397 (<http://analysis.marmosetbrain.org>), including statistical properties such as the fraction of labeled  
398 neurons, the percentage of supragranular neurons, and geodesic distances between areas  
399 across the white matter. Importantly, it also provides the cellular connectivity data in a purely  
400 spatial (parcellation-free) format, including the stereotaxic coordinates of ~2 million neurons  
401 labeled by the tracer injections. These results can be downloaded in 3D volume format in  
402 the template space (Majka et al., this issue), so they can be compared with MRI-based topologies.  
403 The portal also makes data available in a machine-mineable way  
404 (<http://analytics.marmosetbrain.org/wiki/api>) to facilitate large-scale models and simulations.

405

406

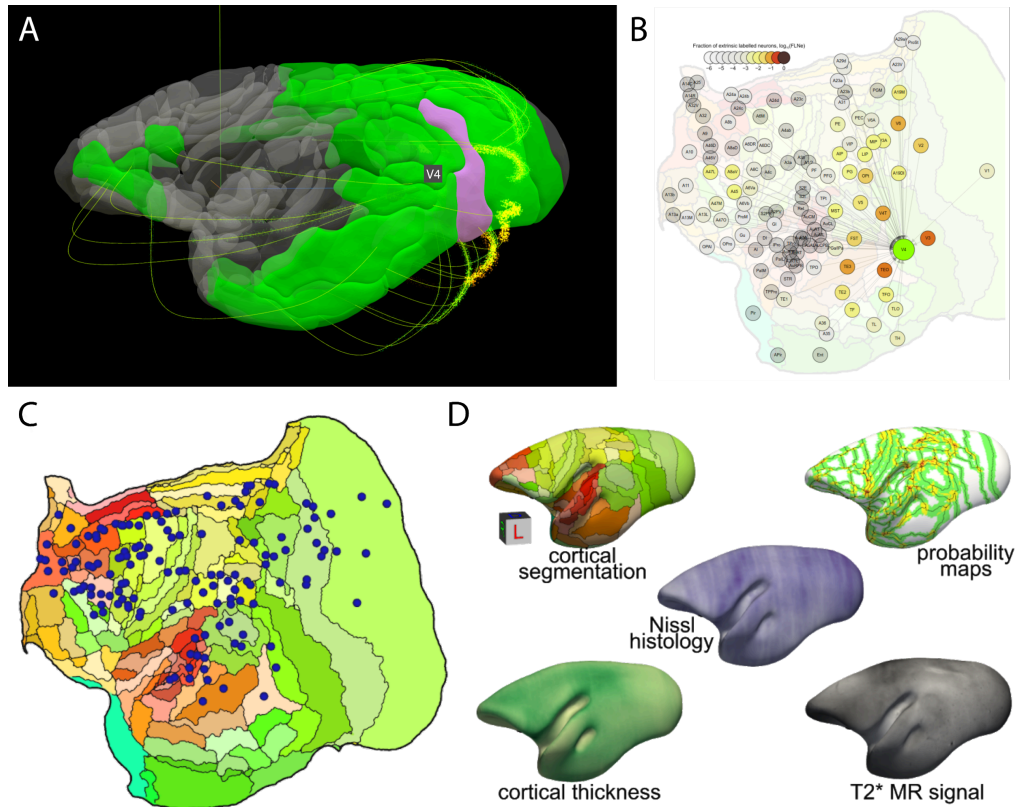

**Figure 2. Marmoset atlases.** **A-B)** Example visualizations available on the website of the Marmoset Brain Mapping Project. **A)** 3D-viewer that demonstrates the connectivity profile of an area selected by clicking (here V4). **B)** Comparison with the weighted and directed connectivity graph based on the results of monosynaptic retrograde fluorescent tracer injections from the Marmoset Brain Connectivity Atlas (<https://analytics.marmosetbrain.org/graph.html>). The graph view highlights the spatial relations between connected areas. Clicking a node reveals further information, including an average connectivity profile, interactive visualizations of the data for each injection, and metadata. **C-D)** Marmoset Connectivity Atlas. **C)** Locations of 143 tracer injections registered to a stereotaxic template illustrated in a 2-dimensional flat-map of the marmoset cortex (**C**). **D)** The main data layers of the histology-based average morphology of the adult marmoset brain showcasing the interoperability of this dataset with neuroimaging research (T2\* MR signal).

407

408

409 Apart from the tracer-based connectivity data (Figure 2C), the portal hosts a collection of other  
410 unique datasets typically inaccessible in non-invasive imaging, such as high-resolution images of  
411 cytoarchitectural characteristics for each of the marmoset cortical areas, stained with a neuron-  
412 specific antibody (Atapour et al., 2019) ([http://www.marmosetbrain.org/cell\\_density](http://www.marmosetbrain.org/cell_density)). Moreover, a  
413 unique histology-based average morphology of the adult marmoset brain provides the basis for  
414 probabilistic registration of digital datasets to cytoarchitectural areas (Majka et al. this issue;  
415 [http://www.marmosetbrain.org/nencki\\_monash\\_template](http://www.marmosetbrain.org/nencki_monash_template)). Spatial transformations to other  
416 marmoset brain templates are included to enable prompt integration with magnetic resonance  
417 imaging (MRI) and tracer-based connectivity studies (Figure 2D).

418

### 419 *3.2.2. Structural MRI Tools*

#### 420 *3.2.2.1. Overview*

421 Pre-processing of structural and functional MRI involves alignment of volumetric data across  
422 scanning sessions or with a species-specific anatomical template/atlas in a standardized space;  
423 segmentation (i.e., differentiation) of the brain from skull, muscle, and other tissues (a.k.a. “skull-  
424 stripping”); segmentation of different tissue classes within the brain (e.g. gray and white matter).  
425 Additionally, volumetric cortical data are sometimes represented on a flat map or surface map by  
426 creating individualized surfaces or projecting data to a common surface. Here we briefly describe  
427 some PRIME-RE resources for handling volumetric data. Typically, anatomical scans are  
428 analyzed in detail and the results are then also applied to any functional data collected in the  
429 same scanning session.

430 Some of the structural tools described perform a single pre-processing step, allowing them to be  
431 flexibly used with other tools. Examples of dedicated alignment tools are Reorient, which does  
432 rigid body alignment and cropping the borders of a scan, and RheMAP, which provides the non-  
433 linear warps between various macaque templates. Dedicated segmentation tools include the  
434 interactive Thresholdmann and the machine-learning based UNet, both of which generate binary  
435 brain masks, and BrainBox, which is well suited for the collaborative development of binary or  
436 multi-valued masks.

437 Other resources perform multiple steps within a single software environment or by calling on  
438 various other tools. For example, Macapype uses several tools interchangeably to perform  
439 alignment, normalization, and segmentation operations. Similarly, AFNI's @animal\_warper

440 computes and applies a nonlinear alignment between a subject and a template and can warp the  
441 template's masks to create a brain mask, tissue segmentation, and atlas parcellation for the  
442 individual. For other tools, alignment and segmentation are precursors to additional steps such  
443 as surface generation (e.g., CIVET-Macaque, PREEMACS) or functional analysis (e.g., C-PAC).

444 PRIME-RE offers four tools for generating surfaces from volumetric monkey data. The NHP-  
445 Freesurfer, PREEMACS, and Precon\_all tools all utilize the Freesurfer software package in  
446 conjunction with several other tools. In contrast, CIVET-macaque is a novel adaptation of CIVET  
447 for use with monkey data. It can be used to characterize surface morphology such as cortical  
448 thickness (Lepage et al., this issue). All four programs require a T1-weighted anatomical scan.  
449 Both CIVET-macaque and PREEMACS can take an optional T2-weighted scan as well, and both  
450 provide quality control tools.

451

### 452 *3.2.2.2. Alignment and registration tools*

453 Having properly oriented MRI datasets is important for many neuroimaging workflows and often  
454 crucial for further segmentation or registration across functional, anatomical and template images.  
455 For non-human scans (both *in vivo* and *ex vivo*), orientations and field-of-views can vary  
456 tremendously, which means that a correction through reorientation and cropping is often required  
457 before any standard tools can be used. Group analysis of (f)MRI data is commonly performed in  
458 a standard template space to which individual data are registered. Here we describe tools for  
459 aligning datasets to a template or to each other as well as precalculated registrations between  
460 templates (RheMAP). These tools include Reorient, which aids in visual rigid body alignment,  
461 and nonlinear alignment tools such as macapype and @animal\_warper (see Section 3.2.2.4).

462

#### 463 *3.2.2.2.1. Reorient*

464 *An intuitive web tool for reorienting and cropping MRI data.*

465 Reorient (<https://neuroanatomy.github.io/reorient>) is an open source web application for the  
466 intuitive manual alignment and cropping of MRI NifTI volumes. The MRI scan is dragged onto a  
467 web interface and visualized in an interactive stereotaxic viewer. Users can then translate and  
468 rotate the brain by simply dragging inside the three view planes. An adjustable selection box  
469 determines the cropping of an image. Resulting affine matrices, selection boxes, as well as the

470 reoriented and cropped volume can be saved. The affine matrix and selection box can then be  
471 used in scripted workflows to make these steps reproducible. Existing rotation matrices can also  
472 be loaded or appended in the web interface. Reorient complements existing tools by providing an  
473 intuitive approach for manual image reorientation and all components for a fully reproducible  
474 workflow. It has been used extensively to reorient scans from many different vertebrate species,  
475 including 60 different primate species.

476

#### 477 3.2.2.2.2. *RheMAP*

##### 478 *Precomputed nonlinear warps between common rhesus macaque brain templates.*

479 The generation of accurate nonlinear registrations between different brain images is a time-  
480 consuming and computationally expensive operation. The RheMAP project was created to  
481 generate a set of pre-computed nonlinear registration warps that allow the direct remapping of  
482 (f)MRI data across different common macaque template brains. The non-linear warps were  
483 generated using ANTs (Avants et al., 2008) and the Python code that was used in RheMAP to  
484 compute the warps is available on GitHub (<https://github.com/PRIME-RE/RheMAP>) together with  
485 documentation and example code that explains how to use the warps to remap data between  
486 template spaces or register a single anatomical scan to one or more template spaces (Klink and  
487 Sirmipilatz, 2020). The dataset of computed warps is freely available for download from Zenodo  
488 (Sirmipilatz and Klink, 2020). Registration quality can be visually assessed with the help of  
489 images that are distributed with the code and the dataset. RheMAP already includes a  
490 comprehensive set of templates — NMT (Jung et al., this issue; Seidlitz et al., 2018), D99  
491 (Reveley et al., 2017), INIA19 (Rohlfing et al., 2012), MNI macaque (Frey et al., 2011) and  
492 Yerkes19 (Donahue et al., 2016) — but the provided code allows for easy inclusion of additional  
493 template brains as well. Moreover, the general warp computation workflow can be easily adapted  
494 for other animal species, since the underlying ANTs registration functions do not rely on prior  
495 knowledge about brain size and shape.

496

#### 497 3.2.2.3. *Segmentation tools*

498 Obtaining appropriate tissue masks (brain vs. surrounding tissue, or different tissue types within  
499 the brain itself) can be particularly difficult in non-human brain imaging, as standard automatic  
500 segmentation tools struggle with surrounding muscle tissue, the skull, and the strong intensity

501 gradients that are often present. PRIME-RE lists several tools that can facilitate segmentation of  
502 NHP brain scans.

503

504 *3.2.2.3.1. Thresholdmann*

505 *A web tool for interactively creating adaptive thresholds to segment NifTI images.*

506 A simple intensity threshold can often provide a good initial guess for tissue segmentation, but in  
507 the presence of strong intensity gradients, a threshold that works well for one brain region can  
508 easily fail elsewhere in the same brain image. Thresholdmann ([https://neuroanatomy.github.io/  
509 thresholdmann](https://neuroanatomy.github.io/thresholdmann)) is an open source web tool for the interactive application of space-varying  
510 thresholds to NifTI volumes. It does not require any software downloads or installation and all  
511 processing is done on the user's computer. NifTI volumes are dragged onto a web interface where  
512 they become available for visual exploration in a stereotaxic viewer (Figure 3A). A space-varying  
513 threshold is then created by setting control points, each with their own local threshold value. The  
514 viewer is initialized with one control point at the center of the brain. The addition of further control  
515 points produces a space-varying threshold obtained through radial basis function interpolation.  
516 Each local threshold can be adjusted in real time using sliders. Finally, the thresholded mask, the  
517 space varying threshold and the list of control points can be saved for later use in scripted  
518 workflows. Thresholdmann complements a variety of existing brain segmentation tools with an  
519 easy interface to manually control the segmentation on a local scale. The resulting masks can  
520 serve as starting points for more detailed manual editing using tools such as BrainBox  
521 (<https://brainbox.pasteur.fr>) or ITK Snap (<http://www.itksnap.org>). The interactive approach is  
522 especially valuable for non-human brain imaging data, where it has been successfully used to  
523 create initial brain masks for a variety of vertebrate brains – including many NHP datasets (Heuer  
524 et al., 2019) – as well as developmental data.

525

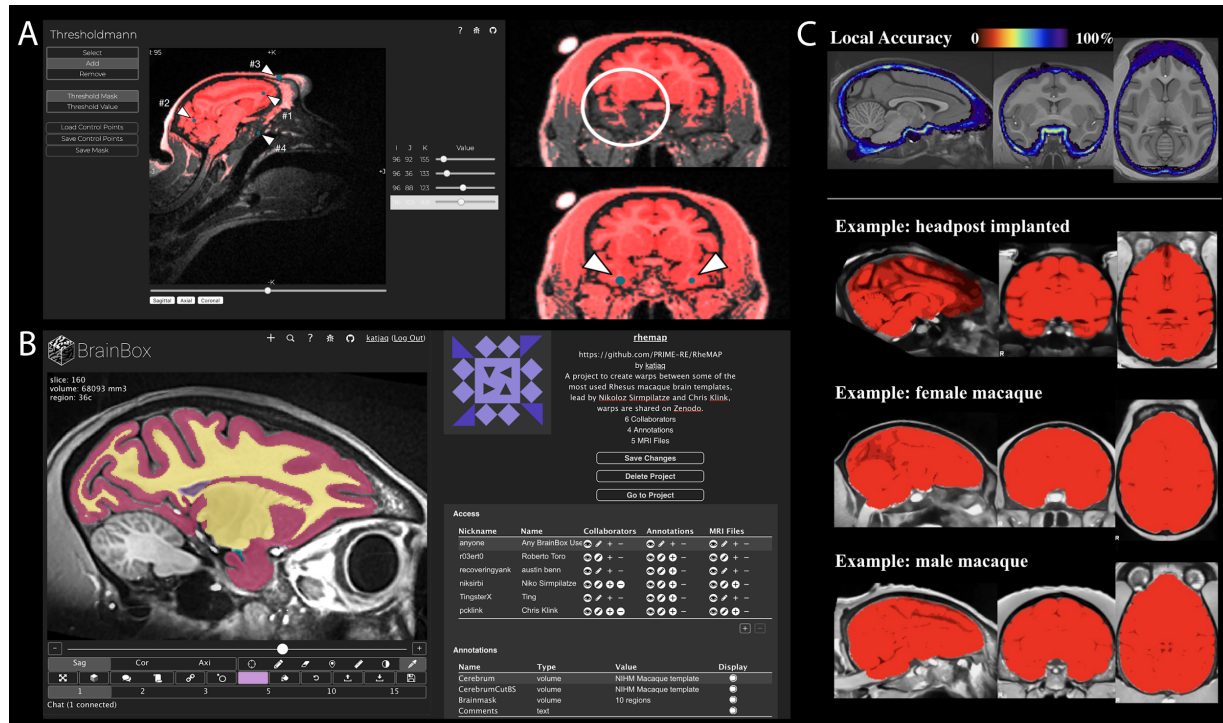

**Figure 3.** Segmentation tools. **A)** Thresholdmann interface (left). Control points (blue dots) are added by clicking at the desired position in the viewer. This adds a slider to the right, which can be used to locally adapt the threshold. If, based on the original control points, some part of the brain is not correctly segmented (right, top; ventral brain area excluded), additional points can be added to apply corrections (right, bottom). **B)** Brainbox interface. MRI page (left): Each MRI has its own page, centralizing the information provided by all the projects including it. Project settings (right): Users can collect datasets into projects, add collaborators, manage access rights, and add annotation layers. **C)** UNet brain extraction accuracy and example results. Local accuracy at each voxel estimated by the regional Dice coefficient (top). Three example results from PRIME-DE (bottom panels).

526

527

528 3.2.2.3.2. *BrainBox*

529 *A web application for real time, collaborative visualization, annotation & segmentation*

530 Automatic brain segmentations often need to be manually adjusted and in some cases a complete  
531 manual segmentation is required. Manual segmentation can however be difficult, time consuming,  
532 and it is often performed by researchers working in isolation, even for shared public data.  
533 BrainBox (<https://brainbox.pasteur.fr>) is an open source tool for the visualization, collaborative  
534 curation and analysis of neuroimaging data. BrainBox makes it possible for several researchers  
535 to simultaneously work on the same dataset in a shared virtual working space. BrainBox can be  
536 used to visualize and provide a layer of human annotation to any dataset available on the Web,  
537 for example, to data stored in Zenodo, FigShare, Google Drive, Dropbox, Amazon S3, GitHub, or  
538 the Open Science Framework. After providing the URL of a dataset, BrainBox presents an  
539 interactive viewer, and a series of editing tools, e.g. for segmenting brain regions, erasing, or  
540 building 3-D models (Figure 3B). Several datasets can be combined into “projects” and project  
541 creators can invite collaborators. Access to the data can range from completely private to  
542 completely open projects. Finally, BrainBox implements a RESTful API (Application Program  
543 Interface) which allows programmatic access to all its data. For example, annotations and  
544 segmentations can be queried by a local python script, or even a shared notebook running on  
545 Google Colab.

546 BrainBox adds a layer of collaborative curation and analysis to shared neuroimaging datasets  
547 using only a web browser, allowing users to incrementally improve each other's work. This  
548 increases scientific efficiency, improves public data quality, and reduces redundant effort. All  
549 PRIME-DE datasets (Milham et al., 2018) are already indexed in BrainBox projects, and ready for  
550 collaboration.

551

552 3.2.2.3.3. *UNet NHP brain extraction tool*

553 *A convolutional neural network model for skull-stripping of NHP images.*

554 The UNet brain extraction tool provides a flexible brain labeling solution to facilitate the  
555 preprocessing of NHP neuroimaging data, particularly for multi-site datasets with different scan  
556 acquisition, quality, and surgical situations (e.g., with head-holder implants) (Figure 3C). The UNet  
557 model was initially trained on a large sample of human neuroimaging data and transferred to the  
558 NHP with additional macaque training samples from the PRIME-DE data repository (Milham et  
559 al., 2018). In order to run the tool with the default model, a user only needs to specify the input



560 T1-weighted image. The full process requires ~20s on a GPU (NVIDIA GTX 1070TI, 700MB  
561 graphics card memory) and ~2-15 min on a CPU, which means it can easily be run on a personal  
562 computer. The current default model has been successfully applied to 136 macaque monkey  
563 scans from 19 sites on PRIME-DE with good performance ([https://github.com/  
564 HumanBrainED/NHP-BrainExtraction](https://github.com/HumanBrainED/NHP-BrainExtraction)). The tool also provides a module for the user to upgrade  
565 the UNet model for a specific dataset (e.g., raw T1w from a highfield scan, MP2RAGE, etc.).  
566 Unlike the traditional neuroimaging tools, no strong imaging background is required for the user  
567 to adjust processing parameters for a specific dataset. Instead, the tool only requires a small  
568 macaque image-set training sample (n=1-2) to upgrade the model and improve performance  
569 accuracy for that specific dataset.

570

#### 571 *3.2.2.4. Alignment and Segmentation Pipelines*

572 In addition to tools that specialize in a single step of structural analysis, there are also several  
573 pipelines listed on PRIME-RE that can take care of multiple structural analysis steps.

574

##### 575 *3.2.2.4.1. Macapype*

576 *An open multi-software framework for non-human primate anatomical MRI processing*

577 Macapype (<https://github.com/Macatools/macapype>) provides an open-source framework to  
578 create customized NHP-specific MRI data processing pipelines based on Nipype (Gorgolewski et  
579 al., 2011). Nipype is a widely-adopted Python framework for human MRI data processing, which  
580 provides wrappers of various commands and functions from well-known neuroimaging software  
581 (e.g., AFNI, FSL, SPM12, ANTs). In Macapype, custom scripts specific to NHP data processing  
582 are also wrapped. These include a brain extraction tool (AtlasBEX; Lohmeier et al., 2019) and  
583 a script for computing registrations between a subject brain and the NMT macaque template  
584 (NMT\_subject\_align.csh; Seidlitz et al., 2018). Users can thus flexibly construct customized  
585 pipelines by putting together various processing modules (and parameters) that are optimal for  
586 their dataset.

587 Macapype consists of several configurable modules for: 1) Data preparation steps, such as image  
588 reorientation, deoblique-ing, cropping, and the registration and averaging of multiple images; 2)  
589 Anatomical preprocessing steps like bias-correction with ANTs N4BiasCorrection; Tustison et al.,

590 2010) and/or T1w x T2w bias field correction (Rilling et al., 2012), denoising using the adaptive  
591 non local means filter (Manjón et al., 2010), brain extraction (e.g. with AtlasBREX), and brain  
592 segmentation (e.g. using AntsAtroposN4 or SPM Old Segment).

593 Two examples of modular anatomical pipelines are already implemented in the distributed version  
594 of Macapype. They are customized for the preprocessing, brain extraction and segmentation of  
595 macaque anatomical data, and have performed robust segmentations on different datasets. The  
596 first pipeline creates a high quality segmentation in native space for surface reconstruction.  
597 Briefly, the pipeline takes the T1w and T2w images as inputs, and first applies cropping, bias-  
598 correction (via T1w x T2w and N4 intensity bias correction), and denoising (adaptive non-local  
599 means filtering) to improve image quality. Next, brain extraction is performed using AtlasBREX.  
600 For segmentation, transformations between the subject skull-stripped image and the NMT  
601 macaque template are first computed using the NMT\_subject\_align.csh script (Seidlitz et al.,  
602 2018), and then applied to register the NMT tissue segmentations to the subject image. Finally,  
603 segmentation is performed using AntsAtroposN4.sh to segment the subject image in native  
604 space, with the template segmentation as priors. The second pipeline reaches the same goal with  
605 different packages. This pipeline provides an iterative sequence for normalization (source to  
606 template space) of T1w and T2w, and provides segmentation with both SPM12 (OldSegment)  
607 and FSL FAST.

608 A docker file is included in the package to allow users to get a fully embedded version of the  
609 pipelines working on any computer without previous installation of MRI processing software. Both  
610 pipelines are compatible with BIDS (Gorgolewski et al., 2016) formatted datasets. The two  
611 pipelines have been demonstrated to achieve robust skull-stripping and segmentation on  
612 anatomical data from different primate species: Pipeline 1 was tested on both macaque (Milham  
613 et al., 2018) and marmoset datasets, while Pipeline 2 was tested on both human and macaque  
614 datasets. Documentation and an extensive description of the segmentation results from the  
615 macaque and marmoset brain extraction and segmentation are available on Github  
616 (<https://macatools.github.io/macapype>).

617

618 3.2.2.4.2. *@animal\_warper*

619 *AFNI program that aligns structural data to a template.*

620 *@animal\_warper* is a bidirectional alignment program made for animal neuroimaging. While  
621 human neuroimaging has typically required a standard template, many animal researchers may  
622 prefer to keep their data in the native acquisition space and move atlas regions and tissue  
623 segmentations into the native space of the subject. Alternatively, data can be transformed to a  
624 standard template space to allow voxelwise group analysis and have the advantage of a  
625 standardized coordinate reporting system.

626 The *@animal\_warper* program proceeds in a series of alignment steps. First, the center of the  
627 input dataset is moved to match the center of the template. Then, an affine alignment uses a 12-  
628 parameter transformation to match translation, rotation, shear and scale. Finally, a nonlinear warp  
629 is computed to align structural details to the template. The inverse warps and inverse affine  
630 transformations are computed and applied for the reverse direction of template to native space.  
631 "Follower" datasets, like ROIs drawn in the native space, can also be transformed into a target  
632 space. Datasets and ROIs typically follow from native to template space; templates, atlases and  
633 segmentations follow from template to native space.

634 The widely varying kinds of data used in animal imaging require different cost functions for  
635 alignment to flexibly deal with the voxel resolution and with the kinds of tissue contrast in each  
636 imaging modality. Several features of *@animal\_warper* address some of the idiosyncrasies of  
637 animal alignment. First, the user can specify a "feature size" that controls blurring and cost  
638 functions. For many macaque MRI datasets, a value of 0.5 mm, which roughly matches the  
639 apparent voxel resolution, is a useful feature size. Other species, such as mouse, marmoset, and  
640 rat, may require a feature size that accommodates the finer voxel resolution typically used with  
641 these animals. Animal brain sizes can vary dramatically from each other and from any particular  
642 template, so a "supersize" option allows for up to a 50% difference in size. The program applies  
643 a kind of spatial regularization for ROI and atlas regions that goes beyond the typical nearest  
644 neighbor interpolation; a modal smoothing is applied to all transformed ROIs. This kind of  
645 smoothing assigns to each voxel the most common voxel value in a user-specified radius around  
646 it.

647 *@animal\_warper* is developed within the larger AFNI software ecosystem. The computed  
648 transformations serve as input to a general fMRI processing pipeline implemented with  
649 *afni\_proc.py* (see section 3.2.3.1). Output datasets in native space are viewable in the AFNI GUI

650 and marked with the appropriate space. Data that have been transformed to a standard space  
651 have all the functionality of the "whereami" atlas command line and GUI. While NifTI datasets are  
652 marked as being in a scanner, Talairach, MNI or other space, @animal\_warper adds an  
653 identifying space to the data. Atlas regions are generated in the native space both as volumes  
654 (Figure 4A) and as individual surfaces in GifTI format. Every region can be shown by itself or with  
655 any or all other atlas regions along with a simple surface rendition of the template in the native  
656 space of the subject. Quality control reports are generated as simple png images.

657 The program has been tested with a wide variety of the macaque data available on the PRIME-  
658 DE website (Milham et al., 2018). The AFNI website hosts the D99, NMT v1 (Seidlitz et al., 2018),  
659 the stereotaxic NMT v2 templates as well as the D99 atlas and the CHARM (see section 3.2.1.1  
660 and Jung et al., this issue) and SARM (see section 3.2.1.2 and Hartig et al., this issue) hierarchical  
661 atlases.

662

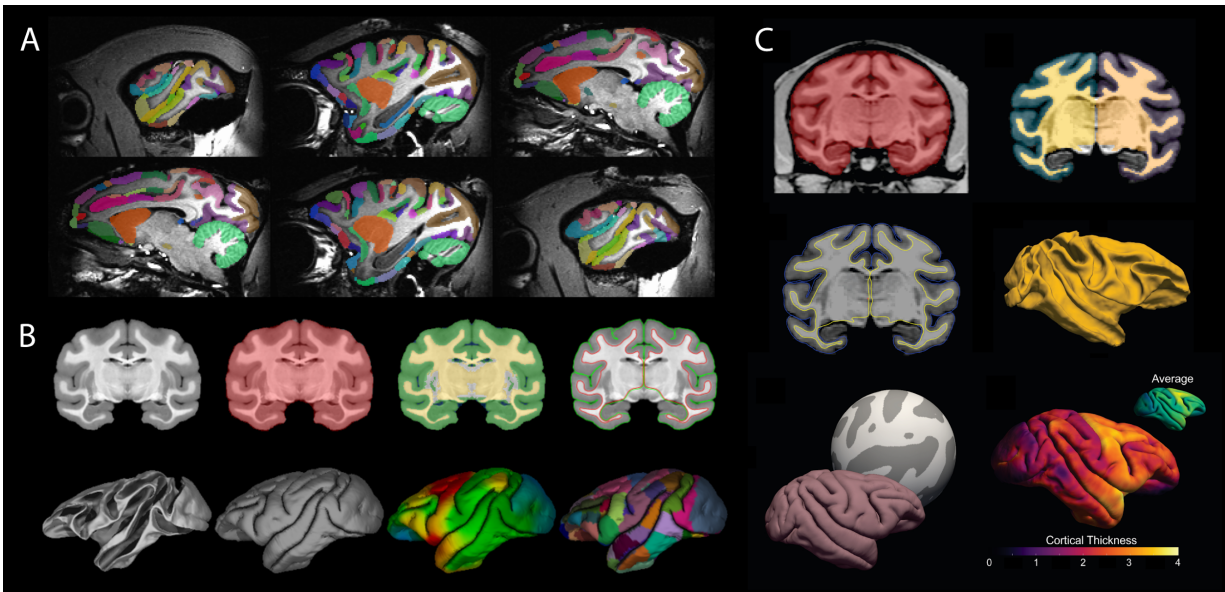

**Figure 4.** Anatomical MRI pipelines. **A)** D99 atlas transformed to native space of a macaque subject with @animal\_warper. **B)** CIVET-macaque results for the D99 subject. Top row (left to right): anatomical scan, brain mask, tissue classification (CSF in dark blue, cortical GM in green, portions of non-cortical GM in white, WM and other non-cortical GM in yellow), and cortical surfaces overlaid on the anatomical scan (WM surface in red, pial surface in green). Bottom row (left to right): white and pial surfaces; cortical thickness (1.0 mm in light blue to 3.5 mm in red) and D99 surface parcellation viewed on the pial surface. **C)** PREEMACS results. Top row, brainmask created by a Deep Learning convolutional neural network model (left) and volumetric tissue segmentation (right). Middle row, white matter and pial surface estimation (left) and white matter surface (right). Bottom row left, surface registration to the PREEMACS Rhesus parameterization template to obtain vertex correspondence between subjects. Bottom row (right), individual cortical thickness estimation. The resulting surfaces can be analyzed in the geometric space of the PREEMACS average surface.

663

664

### 665 3.2.2.5. Surface generation pipelines

666 Surface visualizations offer a rich view of cortical fMRI activity. The generation of surface  
667 visualizations for non-human brains can however be rather involved. The pipelines below were  
668 specifically designed to facilitate this process.

669

#### 670 3.2.2.5.1. CIVET-macaque

671 *A pipeline for generating surfaces and cortical thickness maps from anatomical MRIs*

672 The CIVET pipeline for automated reconstruction of cortical surfaces from *in vivo* human MRI has  
673 been extended for processing macaque brains. CIVET-macaque requires only a T1-weighted MRI  
674 image to generate high resolution cortical surfaces, capable of intersubject surface-based  
675 coregistration with per-vertex correspondence between gray and white matter surfaces.  
676 Preprocessing and surface reconstruction were customized for macaques to address species  
677 related issues such as variations in head size and brain morphology (Lepage et al., this issue).

678 The pipeline features registration to the NMT v1.2 population template (Seidlitz et al., 2018), brain-  
679 masking, tissue classification, cortical surface reconstruction, and calculation of cortical  
680 morphometrics (thickness, surface area, and curvature). Surface-based registration to the NMT  
681 average surface allows for group analysis and regional analysis based on either the D99 or  
682 CHARM anatomical parcellations (Jung et al., this issue). Figure 4B illustrates a typical CIVET  
683 run with the preprocessing stages (top row: registration, brain-masking, tissue classification) and  
684 the generation of the cortical surfaces (bottom row). The preprocessing stages, which can be  
685 generated without cortical surfaces, can serve as the foundation for the analysis of other *in vivo*  
686 modalities (fMRI, qMRI, PET, EEG, MEG, sEEG, etc.) as well as *post-mortem* histological and  
687 genetic data. Images of the outputs from various viewpoints are provided for quality assessment.

688 The full pipeline was successfully run on the *in vivo* scans from the 31 subjects that were used to  
689 make the NMT and on the *ex vivo* scan of the D99 subject. The preprocessing stages of the  
690 pipeline were run on 95 PRIME-DE subjects from 15 sites that provided scans in the sphinx  
691 position with complete sex and age information (Milham et al., 2018). Efforts have also begun to  
692 further extend CIVET to the marmoset and, using archived data, the chimpanzee. The pipeline  
693 thus has the potential to make it possible to study surface-based morphometry across a range of  
694 primate species.

695 3.2.2.5.2. *NHP-Freesurfer*

696 *Creating Freesurfer surfaces of macaque brain scans*

697 Freesurfer (Fischl, 2012) is one of the most widely used software packages for the creation of  
698 surfaces from volumetric MRI data in humans. While it can also be used to process non-human  
699 brains, its convenient recon-all pipeline that automates most of the processing steps cannot be  
700 readily applied to macaque brains due to its differences in size and contrast. NHP-Freesurfer  
701 offers a pipeline that does work for macaque brains. It is based on Freesurfer tools and a number  
702 of additional workarounds. All these steps are explained and pre-coded in annotated Jupyter  
703 Notebooks based on the bash-kernel that allow the user to run the code directly from the  
704 notebook. Unlike recon-all, which is mostly automated, creating high quality surfaces of macaque  
705 brains requires some manual adjustments that can be difficult to figure out for novice users. NHP-  
706 Freesurfer provides a full guide starting with one or more T1-weighted anatomical scans and  
707 ending with surfaces and flatmaps. To facilitate this process, NHP-Freesurfer uses freely available  
708 tools from the NMT template brain (Seidlitz et al., 2018), ANTs (Avants et al., 2008), and AFNI  
709 (Cox, 1996). In addition to the core Freesurfer functionality, NHP-Freesurfer also explains how to  
710 project volumetric statistical results to the Freesurfer surfaces with Freesurfer tools, but this  
711 workflow has been superseded by the NHP-pycortex package (see 3.2.3.5) that uses an adapted  
712 version of PyCortex (Gao et al., 2015) to obtain similar results with a much more flexible approach  
713 based on the Python programming language.

714

715 3.2.2.5.3. *Precon\_all*

716 *An automated Freesurfer and HCP compliant surface pipeline for preclinical animal models*

717 Precon\_all is a surface reconstruction pipeline inspired by Freesurfer's recon-all and adapted for  
718 use with non-human brains (Fischl, 2012). The great success of Freesurfer's recon-all is in part  
719 due to the ease of use for the end user as well as the automation of surface generation from  
720 volumetric data. Precon\_all aims to export this ease of use and automation to the animal imaging  
721 community. In order to achieve the flexibility that makes the precon\_all pipeline work with a large  
722 range of species, a set of 5 easily drawn masks are required as input. Guidelines for drawing  
723 these masks are provided in the precon\_all documentation. Once they are made, they can be  
724 used for an individual subject or added to the precon\_all standards directory and used to automate  
725 surface reconstruction for a new species. Currently, precon\_all comes preloaded with standards  
726 for the NMT v1.2 (Seidlitz et al., 2018) and a pig template.

727 Precon\_all makes use of commonly used software packages, including FSL, ANTs, Freesurfer,  
728 and Connectome Workbench (Avants et al., 2008; Fischl, 2012; Glasser et al., 2013; Jenkinson  
729 et al., 2002). Written as a set of shell scripts, precon\_all is called from the command line and, like  
730 Freesurfer's recon-all, it can be run in stages for manual editing and correction of surfaces. These  
731 stages include brain extraction, segmentation via FAST or ANTs, cutting and filling, surface  
732 generation, and optional surface down-sampling. Outputs are contained within a subject directory  
733 similar to that of recon-all, allowing Freesurfer users to easily transition from human to animal  
734 imaging. Final outputs include Freesurfer and Human Connectome Project compatible cortical  
735 surface models, as well as all required NifTI images and transforms created in the surface  
736 reconstruction process. A set of scripts is provided to easily generate group average surfaces and  
737 registration templates which can then be used to create a custom FSaverage for individual  
738 species.

739

#### 740 3.2.2.5.4. PREEMACS

##### 741 *Brain surfaces and cortical thickness from raw structural data*

742

743 PREEMACS (pipeline for PREprocessing and Extraction of the MACaque brain Surface) is a set  
744 of common tools, customized for Rhesus monkey brain surface extraction and cortical thickness  
745 analysis. Some of the advantages of using PREEMACS are: 1) it avoids manual correction, 2)  
746 the pipeline was developed in the standard MNI monkey space, 3) it provides visual reports in  
747 each module as quality control, and 4) its highly accurate surface extraction with vertex  
748 correspondence between subjects. PREEMACS has a modular design, with three modules  
749 running independently. These modules perform the canonical workflow for MRI preprocessing  
750 (Alfaro-Almagro et al., 2018; Esteban et al., 2019; Glasser et al., 2013) using different previously-  
751 available functions from FSL (Jenkinson et al., 2002), ANTs (Avants et al., 2008), MRtrix (Tournier  
752 et al., 2012), MRIqc (Esteban et al., 2017), DeepBrain (<https://github.com/iitzco/deepbrain>), and  
753 FreeSurfer (Fischl, 2012). Inputs to the pipeline should be one (or preferably more) T1- and T2-  
754 weighted volumes per animal from the same session. Module 1 prepares the raw volumes for  
755 initial preprocessing in six steps: volume orientation, conformation, image cropping, intensity non-  
756 uniformity correction, image averaging, resampling and skull-stripping. Module 2 is the quality  
757 control module. It was adapted from the MRI Quality Control tool (MRIqc) (Esteban et al., 2017)  
758 for humans to obtain image quality metrics and provide a visual report from the results of Module  
759 1. Module 2 uses these quality control metrics to provide a classification of image quality that



760 allows PREEMACS to estimate whether the input will yield an appropriate surface reconstruction.  
761 Finally, Module 3 obtains cortical thickness measures based on the brain surfaces using an NHP-  
762 customized version of Freesurfer v6. To evaluate the generalizability of this procedure,  
763 PREEMACS was tested on two different NHP datasets: PRIME-DE (Milham et al., 2018) (57  
764 subjects) and INB-UNAM (5 subjects). Results (Figure 4C) showed accurate and robust automatic  
765 brain surface extraction for both datasets. PREEMACS thus offers a robust and efficient pipeline  
766 for the automatic NHP-MRI surface analysis.

767

### 768 *3.2.3. Functional MRI Tools*

769 Functional MRI (fMRI) uses time-series data in an attempt to model the fluctuations in the imaging  
770 signal with some type of event structure. These events can be external stimuli (i.e., task-based  
771 fMRI), or the time series of activity in another brain area (i.e., functional connectivity).  
772 Conceptually, the analysis of fMRI data is not radically different across species, but the checks  
773 required at each analysis step do differ. For example, animal scanner setups may produce  
774 different kinds of B0 inhomogeneity and distortions, due to customized coils or the use of other  
775 specialized equipment during acquisition. Both the potential use of anesthesia and contrast  
776 agents can furthermore impact processing choices such as hemodynamic response modeling  
777 and noise filtering. Importantly, pre-processing steps like motion correction and alignment to a  
778 high resolution anatomical scan or template brain often require different options and parameters  
779 compared to what one would choose for human data. For awake animals, body motion can cause  
780 distortions in the magnetic field resulting in slice-specific nonlinear deformations that can be  
781 especially difficult to correct. Proper head-fixation and extensive training will keep such problems  
782 to a minimum, but EPI distortion and brightness artifacts can still occur, requiring post-acquisition  
783 amelioration. The resources below contain several NHP specific solutions to deal with pre-  
784 processing and alignment correctly.

785

#### 786 *3.2.3.1. afni\_proc.py*

787 *AFNI program that generates a complete fMRI processing script from a list of data files and the*  
788 *desired processing steps and options.*

789 AFNI's afni\_proc.py program (Cox, 1996) allows a researcher to create a complete fMRI  
790 processing pipeline for individual subjects, from raw inputs, through alignment to standard space,

791 and regression modeling. To use it, one specifies input datasets (e.g., EPIs, anatomicals, tissue  
792 masks), major processing blocks (motion correction, warping to standard space, blurring,  
793 regression, etc.), and detailed choices for each block (e.g., what kind of alignment, the blur radius,  
794 order of the polynomial for baseline modeling and types of motion regressors). Thus, one can  
795 plan the processing hierarchically, for conceptual clarity and organization. The command  
796 generates a full, commented processing script, which is then executed to carry out single subject  
797 processing. In practice, a typical `afni_proc.py` command contains 20-25 options, which is a very  
798 compact way to specify a full pipeline.

799 For convenience and assured mathematical correctness, `afni_proc.py` automatically takes care  
800 of several aspects of the processing. For example, all warps (motion correction, B0 distortion,  
801 alignment to anatomical and to standard space) are concatenated before being applied to the EPI  
802 dataset to minimize smoothing due to regriding. This allows the user to focus on the parameter  
803 choices in processing, rather than on the technical programming aspects, which greatly reduces  
804 the number of bugs in an analysis stream, particularly if one updates or tweaks existing code.  
805 Because the processing script itself is explicitly created and saved, researchers can check exactly  
806 what steps are occurring in their analysis, and the whole process is documented, which increases  
807 reproducibility.

808 While `afni_proc.py` was mainly developed in conjunction with human brain researchers, it is fully  
809 compatible with animal data and has been applied in animal studies. For example, it integrates  
810 directly with AFNI's `@animal_warper` command (see 3.2.2.4.2) and its list of possible  
811 hemodynamic response functions includes a stimulus response shape for MION (monocrystalline  
812 iron oxide nanoparticle), a contrast-agent that is commonly used in animal neuroimaging studies.  
813 When performing EPI-anatomical alignment, one can furthermore set the minimum “feature size”  
814 of structures to match to a value that is relevant for smaller animal brains.

815 There are currently two demos available in AFNI for macaque fMRI processing with `afni_proc.py`:  
816 one for task-based data (visual stimuli, MION contrast), and the other with resting state data from  
817 PRIME-DE (Milham et al., 2018). Each dataset uses the stereotaxic NMT v2 as its standard space  
818 and demonstrates nonlinear warp estimation with `@animal_warper` (see sections 3.2.1.1,  
819 3.2.2.4.2, and Jung et al., this issue). AFNI is freely available, and most programs are written in  
820 C (as well as Python, R and shell), for generality and computational efficiency.

821

822 3.2.3.2. *C-PAC*

823 *A flexible pipeline for performing preprocessing and connectivity analyses with various tools.*

824 The Configurable Pipeline for the Analysis of Connectomes (C-PAC) is an open-source platform  
825 that allows users to configure their own analysis pipeline for structural and functional MRI data. It  
826 is designed and tested for use with human, non-human primate, and rodent data. One of the key  
827 strengths of C-PAC is its ability to perform different processing strategies on the same dataset.  
828 Multiple tools can be specified for the same type of operation (for example, brain extraction or  
829 registration to a template), with the different results getting saved in separately-labeled output  
830 directories. This allows users to compare a set of methods and evaluate what type of  
831 preprocessing decisions may be best for their data.

832 A web-based pipeline editor is available (<http://fcp-indi.github.io>), but pipeline configuration files  
833 can also be edited with any text editor for quick and easy modifications. C-PAC also features a  
834 visual quality control interface which allows users to inspect the quality of brain extraction,  
835 segmentation, and registration outputs.

836 C-PAC is available as a Docker or Singularity container, allowing users to quickly get started. It  
837 is cloud-compatible through Amazon Web Services (AWS), and a machine image is available with  
838 a ready-to-use C-PAC Docker container for users who wish to run large-scale analyses. Finally,  
839 users can also point directly to a data directory that is hosted on the AWS cloud storage service  
840 (S3), and C-PAC will download and organize the data automatically.

841

842 3.2.3.3. *NeuroElf*

843 *Versatile Matlab-based tool for visualization and (pre-)processing of fMRI data.*

844 Active development of NeuroElf has ceased since its developer is no longer active in  
845 neuroscience. This makes NeuroElf slightly outdated in some respects, as it relies on SPM8, an  
846 older version of the SPM package (Penny et al., 2004). Several components of the resource can  
847 however still be useful for the neuroimaging community. These components include the ability to  
848 import subject-level regression maps into a "GLM" format to rapidly test hypotheses and visualize  
849 bar and scatter plots of extracted regions, as well as some data export utilities, and its scripting  
850 capabilities.

851

852 3.2.3.4. *NHP-BIDS*

853 *A BIDS-compatible Nipype-based pipeline for non-human primate fMRI data.*

854 NHP-BIDS is a pipeline for (pre-)processing of non-human primate fMRI data based on Nipype  
855 (Gorgolewski et al., 2011) and the BIDS (Gorgolewski et al., 2016) conventions for data storage.  
856 It is developed and maintained at the Netherlands Institute for Neuroscience (NIN). The  
857 accompanying Wiki-pages contain instructions to process data from scanner generated dicom  
858 images through to statistical results. The NHP-BIDS pipeline is available in fully configured form,  
859 set up for compatibility with the site where it was developed. However, NHP-BIDS is almost  
860 entirely written in Python and due to its implementation of the Nipype framework, it offers the user  
861 great flexibility in adapting the code-base to implement their own behavioral logging strategies or  
862 preferred choice of image processing modules. The first steps of NHP-BIDS deal with data-  
863 preparation and the creation of BIDS-compatible data structure. Shell scripts are offered that can  
864 easily be adapted to different data curation strategies to ensure automated data handling. Further  
865 data-processing steps are organized in Nipype workflows that can either be run on a local  
866 machine or offloaded to a cluster computing service. Instructions on how to use a SLURM-based  
867 job-scheduling system are included in the wiki.

868 The NHP-BIDS pipeline is modular and saves the intermediate results after every processing step  
869 for quality control. Standard modules used in the NIN-configuration are: 1) a minimal processing  
870 step that reorients the data to correct for the awake NHPs being scanned in sphinx position in a  
871 horizontal scanner; 2) a resampling step to ensure all data has isotropic voxels; 3) extensive  
872 preprocessing that includes non-rigid slice-by-slice realignment based on AFNI tools (Cox, 1996)  
873 and FSL-based motion correction (MCFLIRT) (Jenkinson et al., 2002); 4) registration to NMT  
874 template-space (Seidlitz et al., 2018); and 5) statistical analysis using FSL-FEAT (Woolrich et al.,  
875 2004, 2001). The resulting data can be visualized using standard software packages, or further  
876 processed for projection to the cortical surface using the packages NHP-Freesurfer and NHP-  
877 pycortex that are also made available by the NIN (see sections 3.2.2.5.2 and 3.2.3.5).

878

879 3.2.3.5. *NHP-pycortex*

880 *Projecting volumetric statistical maps to macaque brain surfaces.*

881 Projecting fMRI activity dynamics or statistical maps on surface renderings of the cortex allows a  
882 much richer view of their spatial characteristics than can be obtained with static 2D slice image  
883 renderings. Creating surface renderings and projecting volumetric data to it can however be

884 challenging, especially for non-human data. The Pycortex package (Gao et al., 2015) is a very  
885 flexible python-based toolbox designed to work with human brain surfaces that are generated with  
886 Freesurfer (Fischl, 2012). NHP-pycortex is an adapted version of the pycortex package that is  
887 compatible with the macaque brain surfaces generated with Freesurfer based tools (it is  
888 specifically tailored to the output of NHP-Freesurfer, see section 3.2.2.5.2). Jupyter Notebooks  
889 are provided to guide the user through the process of importing the Freesurfer surfaces into the  
890 Pycortex database and project data to it.

891

### 892 3.2.3.6 *Pypreclin*

893 *A workflow pipeline dedicated to macaque functional and anatomical MRI preprocessing*

894 Pypreclin (Tasserie et al., 2020) was originally developed to face the challenges of artifacts  
895 induced by intracranial implants and body movements during awake fMRI acquisition. The  
896 pipeline development was further extended to a greater panel of experimental parameters such  
897 as BOLD-fMRI, CBV-fMRI (MION contrast agent), anesthesia with different pharmacological  
898 agents, or different RF coil configurations. Pypreclin is a Python module that is available on an  
899 open source repository (<https://github.com/neurospin/pypreclin>) with HTML documentation.

900 Pypreclin development aimed at including state-of-the-art algorithms to allow the automatic  
901 preprocessing of raw fMRI data. The diversity of acquisition conditions and hardware in the  
902 PRIME-DE database (Milham et al., 2018) was used to validate Pypreclin's versatility and  
903 robustness across a large range of magnetic field strengths (1.5, 3, 4.7 and 7T), for data acquired  
904 with both single loop or multi-channel phased-array coils, with or without iron-oxide contrast agent,  
905 in awake and anesthetized animals, and both with or without intracranially implanted electrodes  
906 (Figure 5).

907 Compared to a previously used macaque fMRI preprocessing pipeline at the developer's site  
908 (NeuroSpin Monkey), Pypreclin returned more accurate anatomical localization of neural  
909 activations in the gray matter in the awake state where body movements are often a major issue.  
910 The pipeline supports different brain templates for both *macaca mulatta* (Rhesus macaque) and  
911 *macaca fascicularis* (cynomolgus macaque) and can easily be customized, for instance with  
912 additional templates.

913

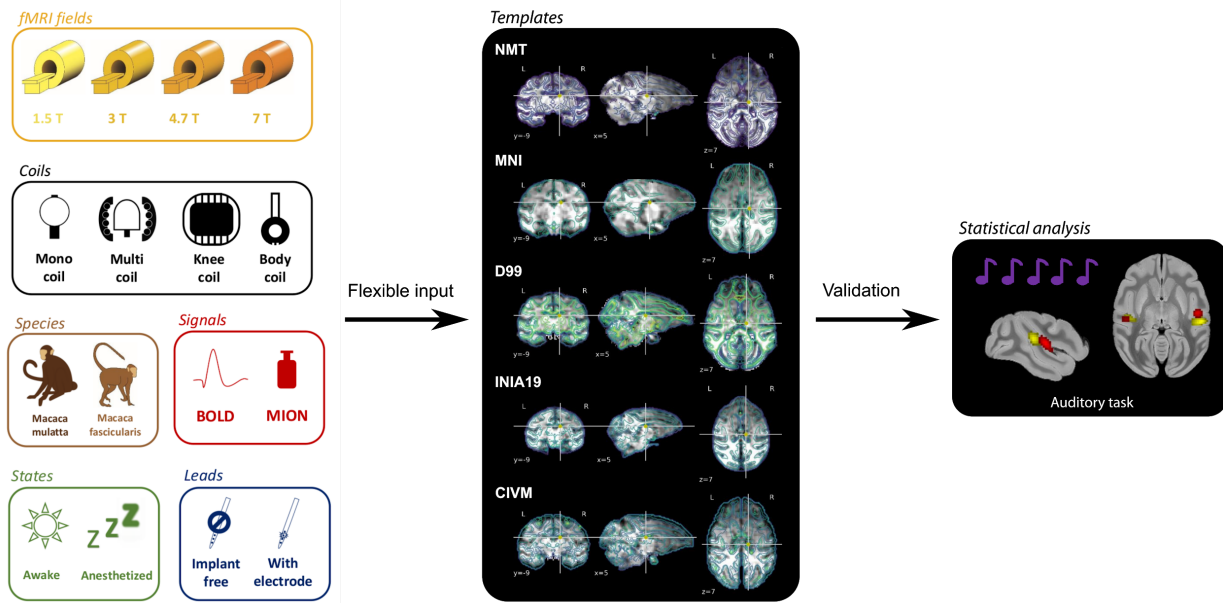

**Figure 5.** Functional MRI pipeline Pypreclin. The Pypreclin pipeline has been validated with a range of input data (left), a broad set of template brains (middle) and auditory task data.

### 915 3.2.4. Diffusion-Weighted MRI Tools

916 Diffusion-weighted MRI is a technique to visualize the organization of the brain's white matter  
917 structure. Although tracer data are generally considered to be the gold standard for connectivity  
918 analysis, their invasive nature and high costs restrict their applicability. Diffusion MRI, however,  
919 can be performed both *ex vivo* and *in vivo* to obtain high quality, repeatable images that can be  
920 compared across species.

921 Several MRI software packages contain sets of diffusion processing tools that can be applied to  
922 either human or non-human datasets. The diffusion data processing and probabilistic  
923 tractography functions in FSL (Behrens et al., 2007; Jenkinson et al., 2002) were recently  
924 expanded with the Xtract tool to facilitate explicit comparison of fiber tracts across species. Xtract  
925 contains tractography libraries for humans and macaques derived from the same protocols  
926 (Warrington et al., 2020) and is currently being extended to include more species, including the  
927 chimpanzee (Bryant et al., 2020). AFNI (Cox, 1996) and TORTOISE (Pierpaoli, et al., 2010) have  
928 several diffusion processing tools and integrated features for distortion correction (Irfanoglu et al.,  
929 2015), deterministic and probabilistic tractography (Taylor and Saad, 2013), tensor-based  
930 morphometry (Hutchinson et al., 2018; Irfanoglu et al., 2016), and network-based structural  
931 analyses (Taylor et al., 2016b). Additionally, Dipy is a Python-based software toolbox for diffusion  
932 processing (Garyfallidis et al., 2014), and DSI-Studio contains tools for tracking and statistics with  
933 a particular focus on high angular resolution diffusion imaging (HARDI) techniques ([http://dsi-  
934 studio.labsolver.org](http://dsi-studio.labsolver.org)). These and other software solutions provide a wide range of functionalities  
935 that are often either complementary or integrable and facilitate analysis for various acquisition  
936 and study paradigms.

937

#### 938 3.2.4.1. Mr Cat

939 *Pipelines for processing of structural, functional, and diffusion non-human MRI data.*

940 The MR Comparative Anatomy Toolbox (Mr Cat; [www.neuroecologylab.org](http://www.neuroecologylab.org)) specializes  
941 predominantly in processing *post-mortem* data of a wide variety of brains, which are preprocessed  
942 using adaptations of FSL tools implemented in the 'phoenix' module. A number of post-processing  
943 modules are furthermore aimed at providing quantitative comparisons of brain organization across  
944 species. These are often based on connectivity measures, including matching of areal  
945 connectivity fingerprints across species (Mars et al., 2016) or comparisons of 'connectivity  
946 blueprints' of the cortex with the whole brain that allow the description of different brains in terms

947 of a common connectivity space (Mars et al., 2018b). Recent extensions of this approach focus  
948 on the comparison of brain organization measured by multiple modalities, testing in effect whether  
949 the relationship between distinct aspects of brain organization differs across species (Eichert et  
950 al., 2020).

951

### 952 *3.2.4.2. Diffusion-MRI*

#### 953 *Pre- and postprocessing steps for diffusion-weighted imaging*

954 The Diffusion-MRI repository hosts Jupyter notebooks in Python and bash that guide users  
955 through multiple pre- and post-processing steps in the analysis of diffusion-weighted imaging  
956 (DWI) data. A step-by-step example analysis is provided of macaque DWI data from PRIME-DE  
957 (Milham et al., 2018). While the workflows were developed and tested with macaque data, they  
958 can easily be adapted for other primate brains. The workflow, which is based on tools from the  
959 Nipype (Gorgolewski et al., 2011), Dipy (Garyfallidis et al., 2014), FSL (Jenkinson et al., 2012)  
960 and MRtrix3 (Tournier et al., 2012) software libraries, requires single-shell or multi-shell DWI data  
961 in NIfTI file format as input, with reverse phase-encoding acquisition containing at least one non-  
962 diffusion-weighted image. Preprocessing includes denoising (Veraart et al., 2016), correction for  
963 susceptibility distortions, eddy current distortions, and subject movement artifacts using TOPUP  
964 (Andersson et al., 2003) and EDDY (Andersson and Sotiropoulos, 2016). Post-processing  
965 includes standard and advanced DWI models to fit the diffusion signal, including Diffusion Tensor  
966 Imaging (DTI) (Basser et al., 1994), Diffusion Kurtosis Imaging (DKI) (Jensen et al., 2005), Neurite  
967 Orientation Dispersion and Density Imaging (NODDI) (Zhang et al., 2012), Single-Shell 3-tissue  
968 Constrained Spherical Deconvolution (SS3T-CSD) (<https://3tissue.github.io>), and Multi-Shell  
969 Multi-Tissue Constrained Spherical Deconvolution (MSMT-CSD) (Jeurissen et al., 2014). The  
970 outputs are parametric maps extracted from the various model fits. The DTI model results in maps  
971 of axial, radial, and mean diffusivity, as well as fractional anisotropy. The DKI model – an  
972 extension of the DTI that captures diffusion non-gaussianity – also outputs axial, radial, and mean  
973 kurtosis. The three-compartment NODDI is fitted using Accelerated Microstructure Imaging via  
974 Convex Optimization (AMICO) (Daducci et al., 2015) and computes maps of Intra-cellular Volume  
975 Fraction (a measure of neurite density), cerebrospinal fluid (CSF) volume fraction, and fiber  
976 orientation dispersion. SS3T- and MSMT-CSD are used to estimate the multi-tissue orientation  
977 distribution function followed by whole-brain tractography (Figure 6A).



978 3.2.4.3. *FATCAT and TORTOISE*

979 *DWI processing, distortion correction, tractography and various group analyses*

980 Diffusion-based imaging provides a great deal of structural information about the brain, with a  
981 particular emphasis on WM properties. It also presents particular processing and quality control  
982 (QC) challenges for limiting the effects of distortions due to subject motion, eddy currents and EPI  
983 inhomogeneity. AFNI's FATCAT (Taylor and Saad, 2013) and the TORTOISE toolbox (Pierpaoli,  
984 et al., 2010) provide a full set of programs for processing and visualizing diffusion data, from  
985 DICOM conversion through distortion correction to group analysis, including quality control.  
986 FATCAT contains validated deterministic and probabilistic tracking tools (Taylor et al., 2012) that  
987 can be used for DTI- and HARDI-based modeling. Examples of tractographic output for a high-  
988 resolution macaque dataset are shown in Figure 6B. These tools can be useful in performing  
989 network-based comparisons of structural properties (Taylor et al., 2016b), possibly in conjunction  
990 with functional network studies. TORTOISE provides methods for group analysis based on  
991 separate comparisons of structural properties from diffeomorphic registrations (DR\_TAMAS;  
992 (Irfanoglu et al., 2016). Study design is important for all aspects of analysis, but the DWI  
993 acquisition method particularly affects how well distortion artifacts can be reduced. Acquiring sets  
994 of DWIs with opposite phase encoding has been shown important in reducing EPI inhomogeneity  
995 distortions (Irfanoglu et al., 2019, 2015), especially in the presence of subject motion (Taylor et  
996 al., 2016a). A T2-weighted structural volume with fat suppression can furthermore act as a useful  
997 reference for further reduction of geometric distortions. TORTOISE's tools have been designed  
998 to take advantage of such acquisitions.

999 Multiple demos for TORTOISE and AFNI's FATCAT are available. The FATCAT\_DEMO2  
1000 illustrates full single subject processing of a dual-phase encoded DWI dataset, including  
1001 probabilistic tractography on gray matter parcellation. Each step of processing automatically  
1002 generates QC images to help evaluate the data. These include alignment images, subject motion  
1003 plots, directionally encoded color (DEC) maps, thresholded FA maps, and ROI overlays. The  
1004 FAT\_MVM\_DEMO provides an example of combining FATCAT tractography results from a  
1005 network of target ROIs with multivariate modeling (MVM) for a hierarchical group analysis: first,  
1006 at the "network level" with an omnibus F-statistic, and then zooming in at the "ROI level" with post  
1007 hoc t-tests. The techniques in each of these demos can be applied directly to other human or  
1008 animal studies.

1009

1010

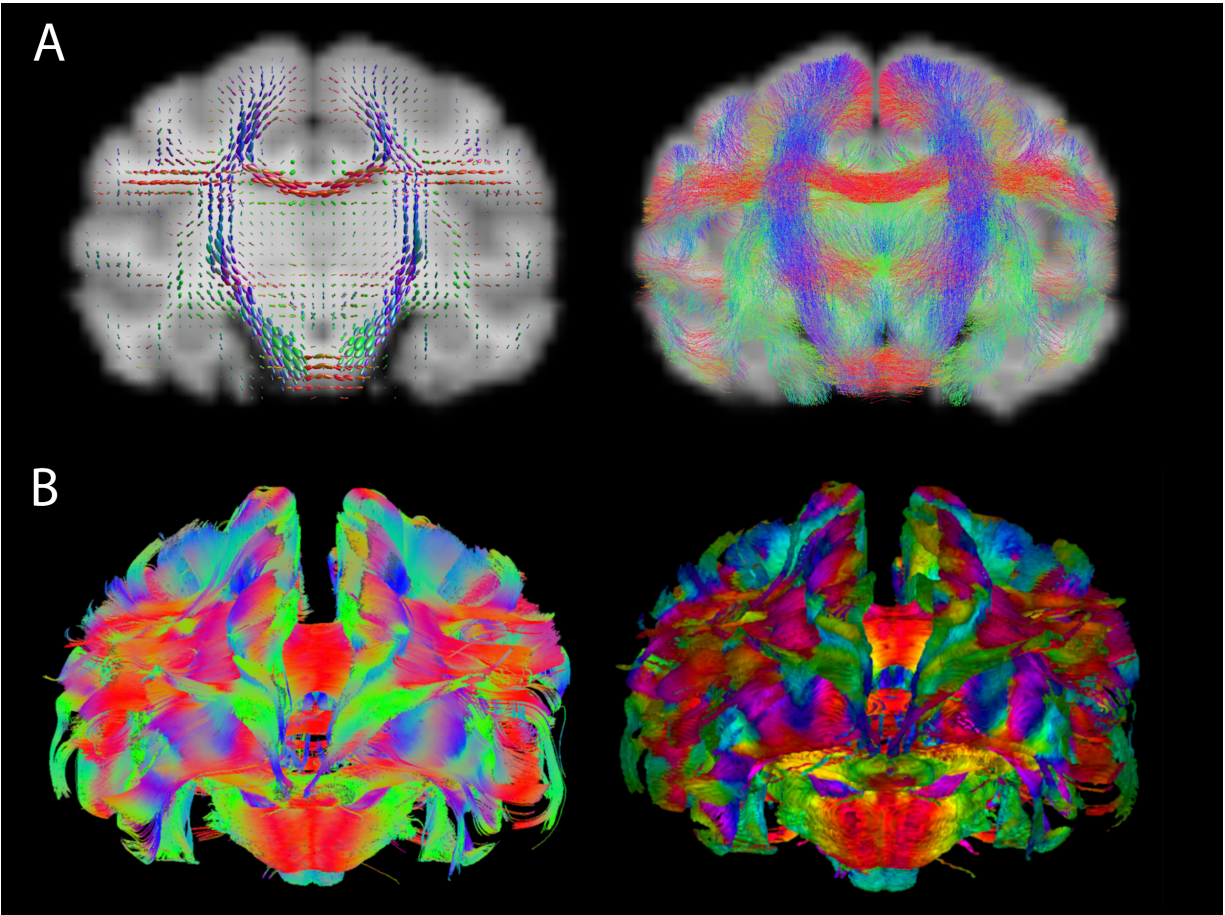

**Figure 6.** Diffusion-weighted MRI. **A)** Result from the Diffusion-MRI resource using macaque data. Fiber orientation distributions (left) and tractography (right). **B)** Examples of DTI-based tractographic output in a high-resolution macaque dataset in AFNI, following distortion correction with TORTOISE. Both images show a (frontal) coronal view of whole brain tracking using AFNI's 3dTrackID: the left panel shows the results of deterministic tracking (as tract fibers), and the right panel shows the results of probabilistic tracking (as WM volume surfaces). Coloration reflects the orientation of the local structure relative to the coordinate frame, where red, blue and green are parallel to the x-, y- and z-axes, respectively. In the probabilistic panel, the FA value modulates the brightness (higher FA is brighter). The images are displayed using SUMA.

1011

1012

### 1013 3.2.5. Data sharing

1014 As an extension of the PRIME-DE consortium, which was established to openly share NHP  
1015 neuroimaging data (Milham et al., 2020, 2018), PRIME-RE also maintains a list of NHP  
1016 neuroimaging data-sharing initiatives. Similar to the analytical resources described above,  
1017 anyone can submit a (link to a) data resource for inclusion on PRIME-RE using a simple  
1018 submission form. The data sharing section of PRIME-RE currently lists PRIME-DE, OpenNeuro,  
1019 and NeuroVault. The PRIME-DE initiative (Milham et al., 2018) specifically focuses on NHP data  
1020 and comprises data from 22 different sites all over the world. The database contains structural,  
1021 functional and diffusion data; BOLD and contrast-agent data; awake and anesthetized scans;  
1022 resting-state and task-based fMRI. OpenNeuro, previously known as OpenfMRI (Poldrack et al.,  
1023 2013; Poldrack and Gorgolewski, 2017) hosts MRI, MEG, EEG, iEEG, and ECoG data. Most of  
1024 the data are from human subjects, but OpenNeuro is not restricted to human data and some NHP  
1025 data-sets are now available as well. Neurovault (Gorgolewski et al., 2015) specializes in sharing  
1026 un-thresholded statistical maps, mask files, parcellation maps, and any other voxelwise data.  
1027 Originally restricted to human imaging data, the framework was recently extended to allow non-  
1028 human data as well (Fox et al., this issue). For NHP data, volumetric data should be registered to  
1029 the NMT, a processing step that can easily be done using several of the tools listed on PRIME-  
1030 RE (see section 3.2.2).

1031

## 1032 4. Discussion

1033 Neuroimaging with non-human primates requires highly specific experimental and analytical  
1034 expertise. Recent initiatives such as PRIME-DE (Milham et al., 2018) have made a wealth of  
1035 shared NHP neuroimaging data openly available, but the analysis of these datasets demands  
1036 appropriate analytical expertise, tools, and workflows. To facilitate the study of NHP neuroimaging  
1037 data, PRIME-RE was established as an infrastructure for knowledge and resource sharing,  
1038 collaboration and communication. The PRIME-RE website serves as a central knowledge hub for  
1039 the NHP neuroimaging community. It is home to a structured dynamic overview of relevant  
1040 analytical resources, and a continuously evolving wiki that describes the challenges and potential  
1041 solutions of all facets of NHP neuroimaging. Both these knowledge bases are collectively curated  
1042 by community-driven practices. This content makes PRIME-RE a NHP-specific complement to  
1043 more broadly oriented sites, such as the Neuroimaging Tools and Resources Collaboratory  
1044 (NITRC, <https://www.nitrc.org>) (Kennedy et al., 2016; Luo et al., 2009) that catalogues data, tools

1045 and pipelines for all general aspects of neuroimaging. A common data structure to reference  
1046 research resources, such as the RRID (Research Resource Identifier) (Bandrowski et al., 2016)  
1047 might allow seamless integration of the resources in PRIME-RE and NITRC in the future.

1048 It is common for development teams of broadly used neuroimaging packages to organize courses  
1049 focused on the use of their specific package (e.g., AFNI<sup>1</sup>, FSL<sup>2</sup>, or SPM<sup>3</sup>). In recent years, open  
1050 science initiatives such as Brainhack (Craddock et al., 2016) and the NeuroHackademy, have led  
1051 to a boost in the creation of tutorials, courses, demos and workshops that more generally cover  
1052 different aspects of neuroimaging and open science practices. While this content is often spread  
1053 over various websites, some efforts are being made to curate this information (e.g., [https://learn-  
1054 neuroimaging.github.io/tutorials-and-resources](https://learn-neuroimaging.github.io/tutorials-and-resources)). Besides its community-curated wiki and links to  
1055 tutorials and documentation for individual resources, PRIME-RE also hosts a list of links to  
1056 external tutorial and resource collections that may be useful for the NHP neuroimaging  
1057 community.

1058 The PRIME-DE/RE initiatives follow on prior large-scale human neuroimaging resources, such as  
1059 the 1000 Functional Connectomes Project (Biswal et al., 2010), ADHD-200 (Brown et al., 2012)  
1060 or ABIDE (Di Martino et al., 2014). In these projects, data sharing was complemented by open  
1061 source pipelines for preprocessing and analyzing the data (Configurable Pipeline for the Analysis  
1062 of Connectomes) (Craddock et al., 2013). While these accompanying tools may be limited in  
1063 resolving all potential issues, their early release lowers the barrier for users to engage with the  
1064 shared data, and accelerates the development of novel analysis solutions. By focusing on  
1065 community building, PRIME-RE aims to provide a broad dynamic framework to channel the efforts  
1066 of the NHP neuroimaging community and evolve together. In the future, PRIME-RE may be  
1067 expanded to include an even broader spectrum of resources involved in NHP neuroimaging, such  
1068 as blueprints for hardware, electronic schematics, models for 3-D printing or laser cutting, or  
1069 protocols for data acquisition (e.g., sequences), animal care, training and handling.

1070 PRIME-RE supports best practices of open science at every step from data acquisition, through  
1071 data organization, to code structure and analysis. Contributors and users are encouraged to  
1072 adhere to the FAIR principles (Wilkinson et al., 2016) and both communicate and document their  
1073 tools and data. Compared to human neuroimaging, NHP neuroimaging has been lagging behind

---

<sup>1</sup> [https://afni.nimh.nih.gov/pub/dist/doc/html/doc/educational/bootcamp\\_recordings.html](https://afni.nimh.nih.gov/pub/dist/doc/html/doc/educational/bootcamp_recordings.html)

<sup>2</sup> <https://fsl.fmrib.ox.ac.uk/fslcourse>

<sup>3</sup> <https://www.fil.ion.ucl.ac.uk/spm/course>

1074 in adopting such collaborative open science initiatives, and we can only speculate about the  
1075 reasons why. It is conceivable, for instance, that due to the large amount of work involved in  
1076 overcoming the challenges of NHP neuroimaging, the researchers involved might be a bit more  
1077 protective of their solutions. In many cases, these solutions are furthermore developed by early  
1078 career researchers that tend to get judged on their research output and not necessarily on the  
1079 tools they develop for use by others in the field. Systems neuroscience and translational  
1080 neuroimaging are strongly multidisciplinary in nature, combining elements of biology, psychology,  
1081 physics, engineering and more. Researchers involved in the field cannot be expected to be an  
1082 expert in all these disciplines and a substantial proportion of them may not have extensive formal  
1083 training in mathematics, physics, or programming which could make them reluctant to share their  
1084 custom-written code for outside scrutiny. Another possibility is that such sharing initiatives do  
1085 actually exist but that they are rather difficult to find for outsiders. For instance, because they  
1086 reside on a laboratory's internal servers or personal websites. However, people's attitudes  
1087 towards openly sharing the resource solutions they have developed appears to be improving  
1088 (Balbastre et al., 2017; Tasserie et al., 2020) and new developments in information technology  
1089 promote such initiatives while simultaneously creating avenues to assign explicit credit to  
1090 developers.

1091 A collaborative open approach to NHP neuroimaging will not only foster collaboration in the short  
1092 term, but also guide future development efforts, enhance reproducibility, and benefit the whole  
1093 community in the long term. The contribution template for PRIME-RE requires a minimum set of  
1094 metadata to ensure a consistent and comprehensive resource index (see Table 1). The website  
1095 provides a graphic interface that simplifies database navigation and makes it easy for researchers  
1096 to discover relevant tools, data, and learning material. PRIME-RE's agile governance structure is  
1097 decentralized and open (hosted on GitHub) with clear guides to help researchers integrate into  
1098 the community and contribute to it. The original resources listed on PRIME-RE are maintained by  
1099 their respective developers and indexed in a completely community-driven way. Acting as a  
1100 community-based curation layer on top of open resources reduces processing bottlenecks that  
1101 could be encountered if a small single team were responsible for maintaining and updating the  
1102 system, while simultaneously facilitating scalability, and inclusiveness.

1103 The maintenance of experimental and analytical code is a challenge in academic research. The  
1104 adoption of code development best practices, such as version control, comment inclusion, testing,  
1105 coding style, and continuous integration (Eglen et al., 2017), accelerates the continuous  
1106 improvement of tools and assists in the swift detection and fixing of bugs. Unfortunately, these

1107 practices are not yet common in academia. We strongly advocate for their adoption and are  
1108 hopeful that open and informal communication between researchers and developers at all levels  
1109 of NHP neuroimaging research, as facilitated by PRIME-RE, can accelerate this process.

1110 What makes a neuroimaging resource suitable for use with NHPs or other non-human species?  
1111 While toolboxes that were primarily developed for use in humans sometimes generalize to, or  
1112 contain options for use, in non-human imaging, more often such packages require substantial  
1113 customization for use in non-human species. Built-in assumptions that, while valid for most human  
1114 neuroimaging data, are not met by animal data include subject orientation in the scanner, signal  
1115 quality (contrast), brain size, and field-of-view. An open conversation about such limitations  
1116 between developers and researchers could help the development of tools that are innately  
1117 capable of processing data from a range of different species (and developmental stages). Such  
1118 tools are invaluable for cross-species comparisons that inform our understanding of brain  
1119 evolution and development. Software customizations that are often required to make a package  
1120 compatible with NHP data can make it difficult to assess data quality and intermediate results of  
1121 analytical steps in more comprehensive pipelines. Such quality control is underutilized in  
1122 neuroimaging in general but it is even more crucial for non-human data that is analyzed with tools  
1123 that were not developed for this type of data or extensively tested on it.

1124 Finally, because NHP-specific analysis tools are often developed by a single team for one  
1125 particular research environment, local dependencies could make it difficult for research teams  
1126 elsewhere to employ such tools in their own research, even if they are openly shared. The  
1127 increasing popularity of modular pipelines (Gorgolewski et al., 2011; Mourik et al., 2018; Tasserie  
1128 et al., 2020) is an important improvement for cross-site compatibility and reproducibility and some  
1129 of the broader software packages on PRIME-RE contain functionality that specifically addresses  
1130 this challenge. Packages like AFNI have modularity built-in, while others, like FSL, integrate with  
1131 ‘notebook-style’ scripting modules. A wealth of Python-based tools developed by the NIPY  
1132 community (<https://nipy.org>) furthermore provides access to functions from many different  
1133 analytical toolboxes through standardized wrapper modules that can be used as building blocks  
1134 for analysis and visualization pipelines. The sharing of tools in pre-packaged containers that  
1135 include all dependencies (e.g., Docker or Singularity images) can also make it easier for users to  
1136 try a particular piece of software. Standardization of tools and quality assessment methods benefit  
1137 from predictable data structures and file formats. While PRIME-RE does not host any data itself,  
1138 it does promote the use of standardized data structures like BIDS and platform-neutral data  
1139 formats (e.g. NiftI/GifTI/CifTI).

## 1140 **5. Conclusion**

1141 With PRIME-RE, we introduce a collaborative platform to address the experimental and analysis  
1142 needs of the NHP neuroimaging research community. By allowing the community to curate  
1143 relevant resources, disseminating and encouraging open science practices, and strengthening  
1144 communication and interactions among researchers and developers, we aim to accelerate  
1145 reproducible discovery, minimize redundant efforts, and maximize efficiency of this invaluable  
1146 form of translational and comparative neuroscience.

1147

## 1148 **CRedit authorship contribution statement**

1149 AM, PCK: Conceptualization, Methodology, Project administration, Data curation, Writing,  
1150 Software, Resources, Visualization, Supervision.

1151 NS, JuS, BC, KH: Conceptualization, Writing, Software, Visualization

1152 DSM: Writing, Project administration, Supervision

1153 KKL, RM, TX, DG, BJ, JaS, PT, RT, EAG-V, CS, XW, RAB, RD, HCE, PG-S, SG, RH, CIL, CiL,

1154 PM, HM, MM, MGPR, JT, LU: Writing, Software, Visualization

1155

## 1156 **Code and data availability**

1157 Both the code for the PRIME-RE website (<https://prime-re.github.io>) and its Wiki pages are  
1158 available on GitHub (<https://github.com/PRIME-RE/prime-re.github.io>). All resources described in  
1159 this paper and listed on PRIME-RE are freely available from their respective developers or  
1160 maintainers. Every listing on PRIME-RE comes with a link to the actual resource and a brief  
1161 statement on possible usage restrictions (e.g., citing a specific paper). The list of more common  
1162 software packages may contain packages that require users to purchase a license, but most are  
1163 freely available as well.

1164

## 1165 **Acknowledgements**

1166 We would like to thank Patrick Markwalter for assistance with compiling references, editing and  
1167 formatting. We thank the following people for their contributions to shared resources: Richard C.

1168 Reynolds, Gang Chen, and Robert Cox (AFNI, esp. `afni_proc.py`); Konrad Wagstyl and Alan C.  
1169 Evans (CIVET); Leslie Ungerleider (CIVET, NMT); Cameron Craddock (C-PAC); David Meunier  
1170 and Régis Trapeau (Macapype); Jochen Weber (NeuroElf); Jonathan Williford (NHP-BIDS); Borja  
1171 Ibañez (`precon_all`); Arun Garimella, Felipe Mendez, and Luis Concha (PREEMACS); Antoine  
1172 Grigis and Béchir Jarraya (Pypreclin); Gabriel Devenyi, Nikos K. Logothetis, and George Paxinos  
1173 (SARM) ; Afonso Silva and David Leopold (MBM); Lennart Verhagen and members of the  
1174 Cognitive Neuroecology Lab (MrCat). This research was supported in part by the Intramural  
1175 Research Program of the NIMH and utilized the computational resources of the NIH HPC Biowulf  
1176 cluster (<http://hpc.nih.gov>). Pypreclin work was supported by the Fondation pour la Recherche  
1177 Medicale (FRM grant number ECO20160736100 to JT), Fondation de France, Human Brain  
1178 Project (Corticity project). RT and KH are supported by ANR-19-DATA-0025-01 NeuroWebLab.  
1179 RBM is supported by the Biotechnology and Biological Sciences Research Council (BBSRC) UK  
1180 [BB/N019814/1]. The Wellcome Centre for Integrative Neuroimaging is supported by core funding  
1181 from the Wellcome Trust [203129/Z/16/Z].

1182

## 1183 **References**

- 1184 Alfaro-Almagro, F., Jenkinson, M., Bangerter, N.K., Andersson, J.L.R., Griffanti, L., Douaud, G.,  
1185 Sotiropoulos, S.N., Jbabdi, S., Hernandez-Fernandez, M., Vallee, E., Vidaurre, D.,  
1186 Webster, M., McCarthy, P., Rorden, C., Daducci, A., Alexander, D.C., Zhang, H., Dragonu,  
1187 I., Matthews, P.M., Miller, K.L., Smith, S.M., 2018. Image processing and Quality Control  
1188 for the first 10,000 brain imaging datasets from UK Biobank. *NeuroImage* 166, 400–424.  
1189 <https://doi.org/10/gcsbhf>
- 1190 Andersson, J.L.R., Skare, S., Ashburner, J., 2003. How to correct susceptibility distortions in spin-  
1191 echo echo-planar images: application to diffusion tensor imaging. *Neuroimage* 20, 870–  
1192 888. <https://doi.org/10/bd4z7z>
- 1193 Andersson, J.L.R., Sotiropoulos, S.N., 2016. An integrated approach to correction for off-  
1194 resonance effects and subject movement in diffusion MR imaging. *Neuroimage* 125,  
1195 1063–1078. <https://doi.org/10/f74nhj>
- 1196 Atapour, N., Majka, P., Wolkowicz, I.H., Malamanova, D., Worthy, K.H., Rosa, M.G.P., 2019.  
1197 Neuronal distribution across the cerebral cortex of the marmoset monkey (*Callithrix*  
1198 *jacchus*) | bioRxiv. bioRxiv.



- 1199 Auzias, G., Colliot, O., Glaunès, J.A., Perrot, M., Mangin, J.-F., Trouvé, A., Baillet, S., 2011.  
1200 Diffeomorphic Brain Registration Under Exhaustive Sulcal Constraints. *IEEE T Med*  
1201 *Imaging* 30, 1214–1227. <https://doi.org/10/fjh3jn>
- 1202 Avants, B.B., Epstein, C., Grossman, M., Gee, J., 2008. Symmetric Diffeomorphic Image  
1203 Registration with Cross-Correlation: Evaluating Automated Labeling of Elderly and  
1204 Neurodegenerative Brain. *Medical image analysis* 12, 26–41. <https://doi.org/10/d2dtrm>
- 1205 Balbastre, Y., Rivière, D., Souedet, N., Fischer, C., Hérard, A.-S., Williams, S., Vandenberghe,  
1206 M.E., Flament, J., Aron-Badin, R., Hantraye, P., Mangin, J.-F., Delzescaux, T., 2017.  
1207 *Primatologist: A modular segmentation pipeline for macaque brain morphometry.*  
1208 *Neuroimage* 162, 306–321. <https://doi.org/10/gcm7vf>
- 1209 Bassler, P.J., Mattiello, J., LeBihan, D., 1994. MR diffusion tensor spectroscopy and imaging.  
1210 *Biophys. J.* 66, 259–267. <https://doi.org/10/cpr73q>
- 1211 Behrens, T.E.J., Berg, H.J., Jbabdi, S., Rushworth, M.F.S., Woolrich, M.W., 2007. Probabilistic  
1212 diffusion tractography with multiple fibre orientations: What can we gain? *Neuroimage* 34,  
1213 144–155. <https://doi.org/10/c2tnhj>
- 1214 Biswal, B.B., Mennes, M., Zuo, X.-N., Gohel, S., Kelly, C., Smith, S.M., Beckmann, C.F.,  
1215 Adelstein, J.S., Buckner, R.L., Colcombe, S., Dogonowski, A.-M., Ernst, M., Fair, D.,  
1216 Hampson, M., Hoptman, M.J., Hyde, J.S., Kiviniemi, V.J., Kötter, R., Li, S.-J., Lin, C.-P.,  
1217 Lowe, M.J., Mackay, C., Madden, D.J., Madsen, K.H., Margulies, D.S., Mayberg, H.S.,  
1218 McMahon, K., Monk, C.S., Mostofsky, S.H., Nagel, B.J., Pekar, J.J., Peltier, S.J.,  
1219 Petersen, S.E., Riedl, V., Rombouts, S.A.R.B., Rypma, B., Schlaggar, B.L., Schmidt, S.,  
1220 Seidler, R.D., Siegle, G.J., Sorg, C., Teng, G.-J., Veijola, J., Villringer, A., Walter, M.,  
1221 Wang, L., Weng, X.-C., Whitfield-Gabrieli, S., Williamson, P., Windischberger, C., Zang,  
1222 Y.-F., Zhang, H.-Y., Castellanos, F.X., Milham, M.P., 2010. Toward discovery science of  
1223 human brain function. *PNAS* 107, 4734–4739. <https://doi.org/10/crzzrq>
- 1224 Botvinik-Nezer, R., Holzmeister, F., Camerer, C.F., Dreber, A., Huber, J., Johannesson, M.,  
1225 Kirchler, M., Iwanir, R., Mumford, J.A., Adcock, R.A., Avesani, P., Baczkowski, B.M.,  
1226 Bajracharya, A., Bakst, L., Ball, S., Barilari, M., Bault, N., Beaton, D., Beitner, J., Benoit,  
1227 R.G., Berkers, R.M.W.J., Bhanji, J.P., Biswal, B.B., Bobadilla-Suarez, S., Bortolini, T.,  
1228 Bottenhorn, K.L., Bowring, A., Braem, S., Brooks, H.R., Brudner, E.G., Calderon, C.B.,  
1229 Camilleri, J.A., Castrellon, J.J., Cecchetti, L., Cieslik, E.C., Cole, Z.J., Collignon, O., Cox,  
1230 R.W., Cunningham, W.A., Czoschke, S., Dadi, K., Davis, C.P., Luca, A.D., Delgado, M.R.,  
1231 Demetriou, L., Dennison, J.B., Di, X., Dickie, E.W., Dobryakova, E., Donnat, C.L., Dukart,  
1232 J., Duncan, N.W., Durnez, J., Eed, A., Eickhoff, S.B., Erhart, A., Fontanesi, L., Fricke,

- 1233 G.M., Fu, S., Galván, A., Gau, R., Genon, S., Glatard, T., Glerean, E., Goeman, J.J.,  
1234 Golowin, S.A.E., González-García, C., Gorgolewski, K.J., Grady, C.L., Green, M.A.,  
1235 Guassi Moreira, J.F., Guest, O., Hakimi, S., Hamilton, J.P., Hancock, R., Handjaras, G.,  
1236 Harry, B.B., Hawco, C., Herholz, P., Herman, G., Heunis, S., Hoffstaedter, F., Hogeveen,  
1237 J., Holmes, S., Hu, C.-P., Huettel, S.A., Hughes, M.E., Iacovella, V., Iordan, A.D., Isager,  
1238 P.M., Isik, A.I., Jahn, A., Johnson, M.R., Johnstone, T., Joseph, M.J.E., Juliano, A.C.,  
1239 Kable, J.W., Kassinopoulos, M., Koba, C., Kong, X.-Z., Kosciak, T.R., Kucukboyaci, N.E.,  
1240 Kuhl, B.A., Kupek, S., Laird, A.R., Lamm, C., Langner, R., Lauharatanahirun, N., Lee, H.,  
1241 Lee, S., Leemans, A., Leo, A., Lesage, E., Li, F., Li, M.Y.C., Lim, P.C., Lintz, E.N.,  
1242 Liphardt, S.W., Losecaat Vermeer, A.B., Love, B.C., Mack, M.L., Malpica, N., Marins, T.,  
1243 Maumet, C., McDonald, K., McGuire, J.T., Melerio, H., Méndez Leal, A.S., Meyer, B.,  
1244 Meyer, K.N., Mihai, G., Mitsis, G.D., Moll, J., Nielson, D.M., Nilsonne, G., Notter, M.P.,  
1245 Olivetti, E., Onicas, A.I., Papale, P., Patil, K.R., Peelle, J.E., Pérez, A., Pischedda, D.,  
1246 Poline, J.-B., Prystauka, Y., Ray, S., Reuter-Lorenz, P.A., Reynolds, R.C., Ricciardi, E.,  
1247 Rieck, J.R., Rodriguez-Thompson, A.M., Romy, A., Salo, T., Samanez-Larkin, G.R.,  
1248 Sanz-Morales, E., Schlichting, M.L., Schultz, D.H., Shen, Q., Sheridan, M.A., Silvers, J.A.,  
1249 Skagerlund, K., Smith, A., Smith, D.V., Sokol-Hessner, P., Steinkamp, S.R., Tashjian,  
1250 S.M., Thirion, B., Thorp, J.N., Tinghög, G., Tisdall, L., Tompson, S.H., Toro-Serey, C.,  
1251 Torre Tresols, J.J., Tozzi, L., Truong, V., Turella, L., van 't Veer, A.E., Verguts, T., Vettel,  
1252 J.M., Vijayarajah, S., Vo, K., Wall, M.B., Weeda, W.D., Weis, S., White, D.J., Wisniewski,  
1253 D., Xifra-Porxas, A., Yearling, E.A., Yoon, S., Yuan, R., Yuen, K.S.L., Zhang, L., Zhang,  
1254 X., Zosky, J.E., Nichols, T.E., Poldrack, R.A., Schonberg, T., 2020. Variability in the  
1255 analysis of a single neuroimaging dataset by many teams. *Nature* 582, 84–88.  
1256 <https://doi.org/10/ggwrvt>
- 1257 Brown, M.R.G., Sidhu, G.S., Greiner, R., Asgarian, N., Bastani, M., Silverstone, P.H., Greenshaw,  
1258 A.J., Dursun, S.M., 2012. ADHD-200 Global Competition: diagnosing ADHD using  
1259 personal characteristic data can outperform resting state fMRI measurements. *Front. Syst.*  
1260 *Neurosci.* 6. <https://doi.org/10/gg3ffb>
- 1261 Bryant, K.L., Li, L., Mars, R.B., 2020. A comprehensive atlas of white matter tracts in the  
1262 chimpanzee. *bioRxiv* 2020.01.24.918516. <https://doi.org/10/gg3xn8>
- 1263 Chen, G., Wang, F., Dillenburger, B.C., Friedman, R.M., Chen, L.M., Gore, J.C., Avison, M.J.,  
1264 Roe, A.W., 2012. Functional magnetic resonance imaging of awake monkeys: some  
1265 approaches for improving imaging quality. *Magnetic Resonance Imaging* 30, 36–47.  
1266 <https://doi.org/10/bgwqnt>

- 1267 Cox, R.W., 1996. AFNI: software for analysis and visualization of functional magnetic resonance  
1268 neuroimages. *Comput. Biomed. Res.* 29, 162–173. <https://doi.org/10.1006/cbr.1996.0066>
- 1269 Craddock, C., Sikka, S., Cheung, B., Khanuja, R., Ghosh, S.S., Yan, C., Li, Q., Lurie, D.,  
1270 Vogelstein, J., Burns, R., Colcombe, S., Mennes, M., Kelly, C., Di Martino, A., Castellanos,  
1271 F.X., Milham, M., 2013. Towards Automated Analysis of Connectomes: The Configurable  
1272 Pipeline for the Analysis of Connectomes (C-PAC). *Front. Neuroinform.* 7.  
1273 <https://doi.org/10.3389/fninf.2013.00013>
- 1274 Craddock, R.C., Margulies, D.S., Bellec, P., Nichols, B.N., Alcauter, S., Barrios, F.A., Burnod, Y.,  
1275 Cannistraci, C.J., Cohen-Adad, J., Leener, B.D., Dery, S., Downar, J., Dunlop, K., Franco,  
1276 A.R., Froehlich, C.S., Gerber, A.J., Ghosh, S.S., Grabowski, T.J., Hill, S., Heinsfeld, A.S.,  
1277 Hutchison, R.M., Kundu, P., Laird, A.R., Liew, S.L., Lurie, D.J., McLaren, D.G.,  
1278 Meneguzzi, F., Mennes, M., Mesmoudi, S., O'Connor, D., Pasaye, E.H., Peltier, S., Poline,  
1279 J.B., Prasad, G., Pereira, R.F., Quirion, P.O., Rokem, A., Saad, Z.S., Shi, Y., Strother,  
1280 S.C., Toro, R., Uddin, L.Q., Horn, J.D.V., VanMeter, J.W., Welsh, R.C., Xu, T., 2016.  
1281 Brainhack: A collaborative workshop for the open neuroscience community. *GigaScience*  
1282 5, 16. <https://doi.org/10.1093/gigascience/giaw016>
- 1283 Daducci, A., Canales-Rodríguez, E.J., Zhang, H., Dyrby, T.B., Alexander, D.C., Thiran, J.-P.,  
1284 2015. Accelerated Microstructure Imaging via Convex Optimization (AMICO) from  
1285 diffusion MRI data. *NeuroImage* 105, 32–44. <https://doi.org/10.1016/j.neuroimage.2015.07.061>
- 1286 Di Martino, A., Yan, C.-G., Li, Q., Denio, E., Castellanos, F.X., Alaerts, K., Anderson, J.S., Assaf,  
1287 M., Bookheimer, S.Y., Dapretto, M., Deen, B., Delmonte, S., Dinstein, I., Ertl-Wagner, B.,  
1288 Fair, D.A., Gallagher, L., Kennedy, D.P., Keown, C.L., Keysers, C., Lainhart, J.E., Lord,  
1289 C., Luna, B., Menon, V., Minshew, N.J., Monk, C.S., Mueller, S., Müller, R.-A., Nebel,  
1290 M.B., Nigg, J.T., O'Hearn, K., Pelphrey, K.A., Peltier, S.J., Rudie, J.D., Sunaert, S.,  
1291 Thioux, M., Tyszka, J.M., Uddin, L.Q., Verhoeven, J.S., Wenderoth, N., Wiggins, J.L.,  
1292 Mostofsky, S.H., Milham, M.P., 2014. The autism brain imaging data exchange: towards  
1293 a large-scale evaluation of the intrinsic brain architecture in autism. *Mol. Psychiatry* 19,  
1294 659–667. <https://doi.org/10.1038/mp.2014.10>
- 1295 Donahue, C.J., Sotiropoulos, S.N., Jbabdi, S., Hernandez-Fernandez, M., Behrens, T.E., Dyrby,  
1296 T.B., Coalson, T., Kennedy, H., Knoblauch, K., Essen, D.C.V., Glasser, M.F., 2016. Using  
1297 Diffusion Tractography to Predict Cortical Connection Strength and Distance: A  
1298 Quantitative Comparison with Tracers in the Monkey. *J. Neurosci.* 36, 6758–6770.  
1299 <https://doi.org/10.1523/JNEUROSCI.4511-16.2016>

- 1300 Eglen, S.J., Marwick, B., Halchenko, Y.O., Hanke, M., Sufi, S., Gleeson, P., Silver, R.A., Davison,  
1301 A.P., Lanyon, L., Abrams, M., Wachtler, T., Willshaw, D.J., Pouzat, C., Poline, J.-B., 2017.  
1302 Toward standard practices for sharing computer code and programs in neuroscience.  
1303 Nature Neuroscience 20, 770–773. <https://doi.org/10/gbvwr3>
- 1304 Eichert, N., Robinson, E.C., Bryant, K.L., Jbabdi, S., Jenkinson, M., Li, L., Krug, K., Watkins, K.E.,  
1305 Mars, R.B., 2020. Cross-species cortical alignment identifies different types of anatomical  
1306 reorganization in the primate temporal lobe. eLife 9, e53232. <https://doi.org/10/gg3xqr>
- 1307 Esteban, O., Birman, D., Schaer, M., Koyejo, O.O., Poldrack, R.A., Gorgolewski, K.J., 2017.  
1308 MRIQC: Advancing the automatic prediction of image quality in MRI from unseen sites.  
1309 PLOS ONE 12, e0184661-21. <https://doi.org/10/gbx9j7>
- 1310 Esteban, O., Markiewicz, C.J., Blair, R.W., Moodie, C.A., Isik, A.I., Erramuzpe, A., Kent, J.D.,  
1311 Goncalves, M., DuPre, E., Snyder, M., Oya, H., Ghosh, S.S., Wright, J., Durnez, J.,  
1312 Poldrack, R.A., Gorgolewski, K.J., 2019. fMRIPrep: a robust preprocessing pipeline for  
1313 functional MRI. Nat. Methods 16, 111–116. <https://doi.org/10/gfpmxn>
- 1314 Farivar, R., Vanduffel, W., 2014. Functional MRI of Awake Behaving Macaques Using Standard  
1315 Equipment, in: Advanced Brain Neuroimaging Topics in Health and Disease - Methods  
1316 and Applications.
- 1317 Fischl, B., 2012. FreeSurfer. NeuroImage, 20 YEARS OF fMRI 62, 774–781.  
1318 <https://doi.org/10/fzcbq3>
- 1319 Fox, A.S., Holley, D., Klink, P.C., Arbuckle, S.A., Barnes, C., Diedrichsen, J., Kwok, S.C., Kyle,  
1320 C., Pruszynski, J.A., Seidlitz, J., Zhou, X.-F., Poldrack, R.A., Gorgolewski, K.J., this issue.  
1321 Sharing Voxelwise Neuroimaging Results from Rhesus Monkeys and Other Species with  
1322 Neurovault. NeuroImage.
- 1323 Frey, S., Pandya, D.N., Chakravarty, M.M., Bailey, L., Petrides, M., Collins, D.L., 2011. An MRI  
1324 based average macaque monkey stereotaxic atlas and space (MNI monkey space).  
1325 Neuroimage 55, 1435–1442. <https://doi.org/10/ftkm96>
- 1326 Friedrich, P., Forkel, S.J., Amiez, C., Balsters, J.H., Coulon, O., Fan, L., Goulas, A., Hadj-  
1327 Bouziane, F., Hecht, E.E., Heuer, K., Jiang, T., Latzman, R.D., Liu, X., Loh, K.K.,  
1328 Kaustubh, R.P., Alizée, L.-P., Procyk, E., Sallet, J., Toro, R., Vickery, S., Weis, S., Wilson,  
1329 C., Xu, T., Zerbi, V., Eickhoff, S.B., Margulies, D.S., Mars, R.B., Thiebaut de Schotten, M.,  
1330 this issue. Imaging the primate brain evolution: the next frontier? NeuroImage.
- 1331 Gao, J.S., Huth, A.G., Lescroart, M.D., Gallant, J.L., 2015. Pycortex: an interactive surface  
1332 visualizer for fMRI. Front Neuroinform 9, 162–12. <https://doi.org/10/gfwjz3>

- 1333 Garyfallidis, E., Brett, M., Amirbekian, B., Rokem, A., Van Der Walt, S., Descoteaux, M., Nimmo-  
1334 Smith, I., 2014. Dipy, a library for the analysis of diffusion MRI data. *Front. Neuroinform.*  
1335 8. <https://doi.org/10/gf7rdh>
- 1336 Glasser, M.F., Sotiropoulos, S.N., Wilson, J.A., Coalson, T.S., Fischl, B., Andersson, J.L., Xu, J.,  
1337 Jbabdi, S., Webster, M., Polimeni, J.R., Van Essen, D.C., Jenkinson, M., 2013. The  
1338 minimal preprocessing pipelines for the Human Connectome Project. *NeuroImage,*  
1339 *Mapping the Connectome* 80, 105–124. <https://doi.org/10/f46nj4>
- 1340 Gorgolewski, K., Burns, C.D., Madison, C., Clark, D., Halchenko, Y.O., Waskom, M.L., Ghosh,  
1341 S.S., 2011. Nipype: A Flexible, Lightweight and Extensible Neuroimaging Data Processing  
1342 Framework in Python. *Front Neuroinform* 5, 13. <https://doi.org/10/cmffmh>
- 1343 Gorgolewski, K.J., Auer, T., Calhoun, V.D., Craddock, R.C., Das, S., Duff, E.P., Flandin, G.,  
1344 Ghosh, S.S., Glatard, T., Halchenko, Y.O., Handwerker, D.A., Hanke, M., Keator, D., Li,  
1345 X., Michael, Z., Maumet, C., Nichols, B.N., Nichols, T.E., Pellman, J., Poline, J.-B., Rokem,  
1346 A., Schaefer, G., Sochat, V., Triplett, W., Turner, J.A., Varoquaux, G., Poldrack, R.A.,  
1347 2016. The brain imaging data structure, a format for organizing and describing outputs of  
1348 neuroimaging experiments. *Sci Data* 3, 160044. <https://doi.org/10/f84xjn>
- 1349 Gorgolewski, K.J., Varoquaux, G., Rivera, G., Schwarz, Y., Ghosh, S.S., Maumet, C., Sochat,  
1350 V.V., Nichols, T.E., Poldrack, R.A., Poline, J.-B., Yarkoni, T., Margulies, D.S., 2015.  
1351 NeuroVault.org: a web-based repository for collecting and sharing unthresholded  
1352 statistical maps of the human brain. *Front. Neuroinform.* 9. <https://doi.org/10/ggz9kx>
- 1353 Hartig, R., Glen, D., Jung, B., Logothetis, N.K., Paxinos, G., Garza-Villarreal, E.A., Messinger, A.,  
1354 Evrard, H.C., this issue. Subcortical atlas for macaque functional magnetic resonance  
1355 imaging. *NeuroImage*.
- 1356 Heuer, K., Gulban, O.F., Bazin, P.-L., Osoianu, A., Valabregue, R., Santin, M., Herbin, M., Toro,  
1357 R., 2019. Evolution of neocortical folding: A phylogenetic comparative analysis of MRI  
1358 from 34 primate species. *Cortex, The Evolution of the Mind and the Brain* 118, 275–291.  
1359 <https://doi.org/10/ggqmmn>
- 1360 Horsley, V., Clarke, R.H., 1908. The structure and functions of the cerebellum examined by a new  
1361 method. *Brain* 31, 45–124. <https://doi.org/10/cfnmdz>
- 1362 Hutchinson, E.B., Schwerin, S.C., Radomski, K.L., Sadeghi, N., Komlos, M.E., Irfanoglu, M.O.,  
1363 Juliano, S.L., Pierpaoli, C., 2018. Detection and Distinction of Mild Brain Injury Effects in  
1364 a Ferret Model Using Diffusion Tensor MRI (DTI) and DTI-Driven Tensor-Based  
1365 Morphometry (D-TBM). *Front. Neurosci.* 12. <https://doi.org/10/gd6t4s>

- 1366 Irfanoglu, M.O., Modi, P., Nayak, A., Hutchinson, E.B., Sarlls, J., Pierpaoli, C., 2015. DR-BUDDI  
1367 (Diffeomorphic Registration for Blip-Up blip-Down Diffusion Imaging) method for  
1368 correcting echo planar imaging distortions. *Neuroimage* 106, 284–299.  
1369 <https://doi.org/10/gg43gr>
- 1370 Irfanoglu, M.O., Nayak, A., Jenkins, J., Hutchinson, E.B., Sadeghi, N., Thomas, C.P., Pierpaoli,  
1371 C., 2016. DR-TAMAS: Diffeomorphic Registration for Tensor Accurate alignMent of  
1372 Anatomical Structures. *NeuroImage* 132, 439. <https://doi.org/10/f8jmxx>
- 1373 Irfanoglu, M.O., Sarlls, J., Nayak, A., Pierpaoli, C., 2019. Evaluating corrections for Eddy-currents  
1374 and other EPI distortions in diffusion MRI: methodology and a dataset for benchmarking.  
1375 *Magn Reson Med* 81, 2774–2787. <https://doi.org/10/gg4zqt>
- 1376 Jenkinson, M., Bannister, P., Brady, M., Smith, S., 2002. Improved Optimization for the Robust  
1377 and Accurate Linear Registration and Motion Correction of Brain Images. *Neuroimage* 17,  
1378 825–841. <https://doi.org/10/ctfvqv>
- 1379 Jenkinson, M., Beckmann, C.F., Behrens, T.E.J., Woolrich, M.W., Smith, S.M., 2012. FSL.  
1380 *Neuroimage* 62, 782–790. <https://doi.org/10/b9mzcr>
- 1381 Jensen, J.H., Helpert, J.A., Ramani, A., Lu, H., Kaczynski, K., 2005. Diffusional kurtosis imaging:  
1382 the quantification of non-gaussian water diffusion by means of magnetic resonance  
1383 imaging. *Magn Reson Med* 53, 1432–1440. <https://doi.org/10/d49c67>
- 1384 Jeurissen, B., Tournier, J.-D., Dhollander, T., Connelly, A., Sijbers, J., 2014. Multi-tissue  
1385 constrained spherical deconvolution for improved analysis of multi-shell diffusion MRI  
1386 data. *Neuroimage* 103, 411–426. <https://doi.org/10/f6rb29>
- 1387 Jung, B., Taylor, P.A., Seidlitz, J., Sponheim, C., Perkins, P., Ungerleider, L.G., Glen, D.,  
1388 Messinger, A., this issue. A comprehensive macaque fMRI pipeline and hierarchical atlas.  
1389 *NeuroImage*.
- 1390 Kennedy, D.N., Haselgrove, C., Riehl, J., Preuss, N., Buccigrossi, R., 2016. The NITRC Image  
1391 Repository. *Neuroimage* 124, 1069–1073. <https://doi.org/10/f73jfv>
- 1392 Klink, P.C., Kagan, I., Ferrera, V.P., Fox, A.S., Froudast-Walsh, S., Jarraya, B., Krauzlis, R.J.,  
1393 Messinger, A., Mitchell, A.S., Ortiz-Rios, M., Roberts, A.C., Roe, A.W., Sallet, J., Schmid,  
1394 M.C., Tasserie, J., Tsao, D.Y., Uhrig, L., Wilke, M., Vanduffel, W., Petkov, C.I., this issue.  
1395 *Advances in Brain Perturbation and Neuroimaging in Nonhuman Primates. NeuroImage*.
- 1396 Klink, P.C., Sirmpilatze, N., 2020. RheMAP. GitHub repository. <https://doi.org/10/gg5r>
- 1397 Lepage, C., Wagstyl, K., Jung, B., Seidlitz, J., Sponheim, C., Ungerleider, L., Wang, X., Evans,  
1398 A.C., Messinger, A., this issue. CIVET-macaque: an automated pipeline for MRI-based  
1399 cortical surface generation and cortical thickness in macaques. *NeuroImage*.

- 1400 Liu, C., Ye, F.Q., Newman, J.D., Szczupak, D., Tian, X., Yen, C.C.-C., Majka, P., Glen, D., Rosa,  
1401 M.G.P., Leopold, D.A., Silva, A.C., 2020. A resource for the detailed 3D mapping of white  
1402 matter pathways in the marmoset brain. *Nature Neuroscience* 23, 271–280.  
1403 <https://doi.org/10/gghnqm>
- 1404 Liu, C., Ye, F.Q., Yen, C.C.-C., Newman, J.D., Glen, D., Leopold, D.A., Silva, A.C., 2018. A digital  
1405 3D atlas of the marmoset brain based on multi-modal MRI. *NeuroImage* 169, 106–116.  
1406 <https://doi.org/10/gc5r86>
- 1407 Liu, C., Yen, C.C.-C., Szczupak, D., Tian, X., Glen, D., Silva, A.C., this issue. Marmoset Brain  
1408 Mapping V3: Population multimodal standard volumetric and surface-based templates.  
1409 *NeuroImage*.
- 1410 Logothetis, N.K., 2003. The underpinnings of the BOLD functional magnetic resonance imaging  
1411 signal. *J Neurosci* 23, 3963–3971. <https://doi.org/10/ggzpg3>
- 1412 Logothetis, N.K., Guggenberger, H., Peled, S., Pauls, J., 1999. Functional imaging of the monkey  
1413 brain. *Nat. Neurosci.* 2, 555–562. <https://doi.org/10/d35s2j>
- 1414 Logothetis, N.K., Pauls, J., Augath, M.A., Trinath, T., Oeltermann, A., 2001. Neurophysiological  
1415 investigation of the basis of the fMRI signal. *Nature* 412, 150–157.  
1416 <https://doi.org/10/cmprwx>
- 1417 Logothetis, N.K., Wandell, B.A., 2004. Interpreting the BOLD Signal. *Annu. Rev. Physiol.* 66, 735–  
1418 769. <https://doi.org/10.1146/annurev.physiol.66.082602.092845>
- 1419 Lohmeier, J., Kaneko, T., Hamm, B., Makowski, M.R., Okano, H., 2019. atlasBREX: Automated  
1420 template-derived brain extraction in animal MRI. *Scientific Reports* 9, 12219.  
1421 <https://doi.org/10/gg3qqh>
- 1422 Luo, X.J., Kennedy, D.N., Cohen, Z., 2009. Neuroimaging Informatics Tools and Resources  
1423 Clearinghouse (NITRC) Resource Announcement. *Neuroinform* 7, 55–56.  
1424 <https://doi.org/10/dmgwsv>
- 1425 Majka, P., Bai, S., Bakola, S., Bednarek, S., Chan, J.M., Jermakow, N., Passarelli, L., Reser,  
1426 D.H., Theodoni, P., Worthy, K.H., Wang, X.-J., Wójcik, D.K., Mitra, P.P., Rosa, M.G.P.,  
1427 2020. Open access resource for cellular-resolution analyses of corticocortical connectivity  
1428 in the marmoset monkey. *Nature Communications* 11, 1133. <https://doi.org/10/gg3jzb>
- 1429 Majka, P., Chaplin, T.A., Yu, H.-H., Tolpygo, A., Mitra, P.P., Wójcik, D.K., Rosa, M.G.P., 2016.  
1430 Towards a comprehensive atlas of cortical connections in a primate brain: Mapping tracer  
1431 injection studies of the common marmoset into a reference digital template. *Journal of*  
1432 *Comparative Neurology* 524, 2161–2181. <https://doi.org/10/f8v24v>

- 1433 Mantini, D., Hasson, U., Betti, V., Perrucci, M.G., Romani, G.L., Corbetta, M., Orban, G.A.,  
1434 Vanduffel, W., 2012. Interspecies activity correlations reveal functional correspondence  
1435 between monkey and human brain areas. *Nat Methods* 9, 277–282.  
1436 <https://doi.org/10.1038/nmeth.1868>
- 1437 Mars, R.B., Passingham, R.E., Jbabdi, S., 2018a. Connectivity Fingerprints: From Areal  
1438 Descriptions to Abstract Spaces. *Trends Cogn. Sci. (Regul. Ed.)* 1–12.  
1439 <https://doi.org/10.1016/j.tics.2018.08.009>
- 1440 Mars, R.B., Sotiropoulos, S.N., Passingham, R.E., Sallet, J., Verhagen, L., Khrapitchev, A.A.,  
1441 Sibson, N., Jbabdi, S., 2018b. Whole brain comparative anatomy using connectivity  
1442 blueprints. *eLife* 7, e35237. <https://doi.org/10/gdhk8z>
- 1443 Mars, R.B., Verhagen, L., Gladwin, T.E., Neubert, F.-X., Sallet, J., Rushworth, M.F.S., 2016.  
1444 Comparing brains by matching connectivity profiles. *Neurosci Biobehav Rev* 60, 90–97.  
1445 <https://doi.org/10/f7873k>
- 1446 Milham, M., Petkov, C.I., Margulies, D.S., Schroeder, C.E., Basso, M.A., Belin, P., Fair, D.A., Fox,  
1447 A., Kastner, S., Mars, R.B., Messinger, A., Poirier, C., Vanduffel, W., Van Essen, D.C.,  
1448 Alvard, A., Becker, Y., Ben Hamed, S., Benn, A., Bodin, C., Boretius, S., Cagna, B.,  
1449 Coulon, O., El-Gohary, S.H., Evrard, H., Forkel, S.J., Friedrich, P., Froudust-Walsh, S.,  
1450 Garza-Villarreal, E.A., Gao, Y., Gozzi, A., Grigis, A., Hartig, R., Hayashi, T., Heuer, K.,  
1451 Howells, H., Ardesch, D.J., Jarraya, B., Jarrett, W., Jedema, H.P., Kagan, I., Kelly, C.,  
1452 Kennedy, H., Klink, P.C., Kwok, S.C., Leech, R., Liu, X., Madan, C., Madushanka, W.,  
1453 Majka, P., Mallon, A.-M., Marche, K., Meguerditchian, A., Menon, R.S., Merchant, H.,  
1454 Mitchell, A., Nenning, K.-H., Nikolaidis, A., Ortiz-Rios, M., Pagani, M., Pareek, V., Prescott,  
1455 M., Procyk, E., Rajimehr, R., Rautu, I.-S., Raz, A., Roe, A.W., Rossi-Pool, R.,  
1456 Roumazeilles, L., Sakai, T., Sallet, J., García-Saldivar, P., Sato, C., Sawiak, S., Schiffer,  
1457 M., Schwiedrzik, C.M., Seidlitz, J., Sein, J., Shen, Z., Shmuel, A., Silva, A.C., Simone, L.,  
1458 Sirmipilatze, N., Sliwa, J., Smallwood, J., Tasserie, J., Thiebaut de Schotten, M., Toro, R.,  
1459 Trapeau, R., Uhrig, L., Vezoli, J., Wang, Z., Wells, S., Williams, B., Xu, T., Xu, A.G.,  
1460 Yacoub, E., Zhan, M., Ai, L., Amiez, C., Balezeau, F., Baxter, M.G., Blezer, E.L.A.,  
1461 Brochier, T., Chen, A., Crosson, P.L., Damatac, C.G., Dehaene, S., Everling, S., Fleysher,  
1462 L., Freiwald, W., Griffiths, T.D., Guedj, C., Hadj-Bouziane, F., Harel, N., Hiba, B., Jung,  
1463 B., Koo, B., Laland, K.N., Leopold, D.A., Lindenfors, P., Meunier, M., Mok, K., Morrison,  
1464 J.H., Nacef, J., Nagy, J., Pinsk, M., Reader, S.M., Roelfsema, P.R., Rudko, D.A.,  
1465 Rushworth, M.F.S., Russ, B.E., Schmid, M.C., Sullivan, E.L., Thiele, A., Todorov, O.S.,  
1466 Tsao, D., Ungerleider, L., Wilson, C.R.E., Ye, F.Q., Zarco, W., Zhou, Y., 2020.



- 1467 Accelerating the Evolution of Nonhuman Primate Neuroimaging. *Neuron* 105, 600–603.  
1468 <https://doi.org/10/ggvm7d>
- 1469 Milham, M.P., Ai, L., Koo, B., Xu, T., Amiez, C., Balezeau, F., Baxter, M.G., Blezer, E.L.A.,  
1470 Brochier, T., Chen, A., Crosson, P.L., Damatac, C.G., Dehaene, S., Everling, S., Fair,  
1471 D.A., Fleysher, L., Freiwald, W., Froudust-Walsh, S., Griffiths, T.D., Guedj, C., Hadj-  
1472 Bouziane, F., Ben Hamed, S., Harel, N., Hiba, B., Jarraya, B., Jung, B., Kastner, S., Klink,  
1473 P.C., Kwok, S.C., Laland, K.N., Leopold, D.A., Lindenfors, P., Mars, R.B., Menon, R.S.,  
1474 Messinger, A., Meunier, M., Mok, K., Morrison, J.H., Nacef, J., Nagy, J., Rios, M.O.,  
1475 Petkov, C.I., Pinsk, M., Poirier, C., Procyk, E., Rajimehr, R., Reader, S.M., Roelfsema,  
1476 P.R., Rudko, D.A., Rushworth, M.F.S., Russ, B.E., Sallet, J., Schmid, M.C., Schwiedrzik,  
1477 C.M., Seidlitz, J., Sein, J., Shmuel, A., Sullivan, E.L., Ungerleider, L., Thiele, A., Todorov,  
1478 O.S., Tsao, D., Wang, Z., Wilson, C.R.E., Yacoub, E., Ye, F.Q., Zarco, W., Zhou, Y.,  
1479 Margulies, D.S., Schroeder, C.E., 2018. An Open Resource for Non-human Primate  
1480 Imaging. *Neuron* 100, 61-74.e2. <https://doi.org/10/gffxtn>
- 1481 Mourik, T. van, Snoek, L., Knapen, T., Norris, D.G., 2018. Porcupine: A visual pipeline tool for  
1482 neuroimaging analysis. *PLOS Computational Biology* 14, e1006064.  
1483 <https://doi.org/10/gdhx6p>
- 1484 Paxinos, G., Petrides, M., Evrard, H.C., in preparation. *The Rhesus Monkey Brain in Stereotaxic*  
1485 *Coordinates*, 4th ed. Elsevier.
- 1486 Paxinos, G., Watson, C., Petrides, M., Rosa, M., Tokuno, H., 2012. *The Marmoset Brain in*  
1487 *Stereotaxic Coordinates*, 1st ed. Academic Press.
- 1488 Penny, W., Friston, K.J., Ashburner, J., Kiebel, S., Nichols, T., 2004. *Human Brain Function*.  
1489 Elsevier. <https://doi.org/10.1016/B978-0-12-264841-0.X5000-8>
- 1490 Pierpaoli, C., Walker, L., Irfanoglu, M.O., Barnett, A., Basser, P., Chang, L.-C., Koay, C.G.,  
1491 Pajevic, S., Rohde, G., Sarlls, J., Wu, M., 2010. TORTOISE: An Integrated Software  
1492 Package for Processing of Diffusion MRI Data. Presented at the ISMRM 18th Annual  
1493 Meeting, Stockholm, Sweden, p. 1597.
- 1494 Poldrack, R.A., Barch, D.M., Mitchell, J., Wager, T., Wagner, A.D., Devlin, J.T., Cumba, C.,  
1495 Koyejo, O., Milham, M., 2013. Toward open sharing of task-based fMRI data: the  
1496 OpenfMRI project. *Front. Neuroinform.* 7. <https://doi.org/10/gg3c7d>
- 1497 Poldrack, R.A., Gorgolewski, K.J., 2017. OpenfMRI: Open sharing of task fMRI data. *NeuroImage*,  
1498 *Data Sharing Part II* 144, 259–261. <https://doi.org/10/gg4fm8>

- 1499 Reveley, C., Gruslys, A., Ye, F., Glen, D., Samaha, J., Russ, B., Saad, Z., Seth, A., Leopold, D.,  
1500 Saleem, K., 2017. Three-Dimensional Digital Template Atlas of the Macaque Brain.  
1501 *Cerebral Cortex* 27, 4463–4477. <https://doi.org/10/ggr64q>
- 1502 Rohlfing, T., Kroenke, C.D., Sullivan, E.V., Dubach, M.F., Bowden, D.M., Grant, K., Pfefferbaum,  
1503 A., 2012. The INIA19 Template and NeuroMaps Atlas for Primate Brain Image Parcellation  
1504 and Spatial Normalization. *Front. Neuroinform.* 6. <https://doi.org/10/ggtm5p>
- 1505 Seidlitz, J., Sponheim, C., Glen, D., Ye, F.Q., Saleem, K.S., Leopold, D.A., Ungerleider, L.,  
1506 Messinger, A., 2018. A population MRI brain template and analysis tools for the macaque.  
1507 *NeuroImage, Segmenting the Brain* 170, 121–131. <https://doi.org/10/gc6vs3>
- 1508 Sirmipilatzte, N., Klink, P.C., 2020. RheMAP: Non-linear warps between common rhesus macaque  
1509 brain templates. *Zenodo*. <https://doi.org/10/ggtm5q>
- 1510 Tasserie, J., Grigis, A., Uhrig, L., Dupont, M., Amadon, A., Jarraya, B., 2020. Pypreclin: An  
1511 automatic pipeline for macaque functional MRI preprocessing. *NeuroImage* 207, 116353.  
1512 <https://doi.org/10/ggjqsfs>
- 1513 Taylor, P.A., Alhamud, A., Kouwe, A. van der, Saleh, M.G., Laughton, B., Meintjes, E., 2016a.  
1514 Assessing the performance of different DTI motion correction strategies in the presence  
1515 of EPI distortion correction. *Human Brain Mapping* 37, 4405–4424.  
1516 <https://doi.org/10/gg4zqs>
- 1517 Taylor, P.A., Chen, G., Cox, R.W., Saad, Z.S., 2016b. Open Environment for Multimodal  
1518 Interactive Connectivity Visualization and Analysis. *Brain Connect* 6, 109–121.  
1519 <https://doi.org/10/f8v3bf>
- 1520 Taylor, P.A., Cho, K.-H., Lin, C.-P., Biswal, B.B., 2012. Improving DTI tractography by including  
1521 diagonal tract propagation. *PLoS ONE* 7, e43415. <https://doi.org/10/f367h5>
- 1522 Taylor, P.A., Saad, Z.S., 2013. FATCAT: (an efficient) Functional and Tractographic Connectivity  
1523 Analysis Toolbox. *Brain Connect* 3, 523–535. <https://doi.org/10/gg3xpb>
- 1524 Tournier, J.-D., Calamante, F., Connelly, A., 2012. MRtrix: Diffusion tractography in crossing fiber  
1525 regions. *International Journal of Imaging Systems and Technology* 22, 53–66.  
1526 <https://doi.org/10/gc7rbs>
- 1527 Veraart, J., Novikov, D.S., Christiaens, D., Ades-Aron, B., Sijbers, J., Fieremans, E., 2016.  
1528 Denoising of diffusion MRI using random matrix theory. *Neuroimage* 142, 394–406.  
1529 <https://doi.org/10/f9brgq>
- 1530 Warrington, S., Bryant, K.L., Khrapitchev, A.A., Sallet, J., Charquero-Ballester, M., Douaud, G.,  
1531 Jbabdi, S., Mars, R.B., Sotiropoulos, S.N., 2020. XTRACT - Standardised protocols for

- 1532 automated tractography in the human and macaque brain. *NeuroImage* 217, 116923.  
1533 <https://doi.org/10/ggxpvg>
- 1534 Wilkinson, M.D., Dumontier, M., Aalbersberg, I.J., Appleton, G., Axton, M., Baak, A., Blomberg,  
1535 N., Boiten, J.-W., da Silva Santos, L.B., Bourne, P.E., Bouwman, J., Brookes, A.J., Clark,  
1536 T., Crosas, M., Dillo, I., Dumon, O., Edmunds, S., Evelo, C.T., Finkers, R., Gonzalez-  
1537 Beltran, A., Gray, A.J.G., Groth, P., Goble, C., Grethe, J.S., Heringa, J., 't Hoen, P.A.C.,  
1538 Hooft, R., Kuhn, T., Kok, R., Kok, J., Lusher, S.J., Martone, M.E., Mons, A., Packer, A.L.,  
1539 Persson, B., Rocca-Serra, P., Roos, M., van Schaik, R., Sansone, S.-A., Schultes, E.,  
1540 Sengstag, T., Slater, T., Strawn, G., Swertz, M.A., Thompson, M., van der Lei, J., van  
1541 Mulligen, E., Velterop, J., Waagmeester, A., Wittenburg, P., Wolstencroft, K., Zhao, J.,  
1542 Mons, B., 2016. The FAIR Guiding Principles for scientific data management and  
1543 stewardship. *Scientific Data* 3, 1–9. <https://doi.org/10/bdd4>
- 1544 Woolrich, M.W., Behrens, T.E.J., Smith, S.M., 2004. Constrained linear basis sets for HRF  
1545 modelling using Variational Bayes. *Neuroimage* 21, 1748–1761. <https://doi.org/10/ckrt5g>
- 1546 Woolrich, M.W., Ripley, B.D., Brady, M., Smith, S.M., 2001. Temporal Autocorrelation in  
1547 Univariate Linear Modeling of fMRI Data. *Neuroimage* 14, 1370–1386.  
1548 <https://doi.org/10/cb6tct>
- 1549 Zhang, H., Schneider, T., Wheeler-Kingshott, C.A., Alexander, D.C., 2012. NODDI: practical in  
1550 vivo neurite orientation dispersion and density imaging of the human brain. *Neuroimage*  
1551 61, 1000–1016. <https://doi.org/10/f337v7>
- 1552  
1553

# A collaborative resource platform for non-human primate neuroimaging

Adam Messinger<sup>a</sup>, Nikoloz Sirmipilatz<sup>b,c</sup>, Katja Heuer<sup>d,e</sup>, Kep Kee Loh<sup>f,g</sup>, Rogier B. Mars<sup>h,i</sup>, Julien Sein<sup>f</sup>, Ting Xu<sup>j</sup>, Daniel Glen<sup>k</sup>, Benjamin Jung<sup>a,l</sup>, Jakob Seidlitz<sup>m,n</sup>, Paul Taylor<sup>k</sup>, Roberto Toro<sup>e,o</sup>, Eduardo A. Garza-Villarreal<sup>p</sup>, Caleb Sponheim<sup>q</sup>, Xindi Wang<sup>r</sup>, R. Austin Benn<sup>s</sup>, Bastien Cagnaf, Rakshit Dadarwal<sup>b,c</sup>, Henry C. Evrard<sup>t,u,v,w</sup>, Pamela Garcia-Saldivar<sup>p</sup>, Steven Giavasis<sup>j</sup>, Renée Hartig<sup>t,u,x</sup>, Claude Lepage<sup>r</sup>, Cirong Liu<sup>y</sup>, Piotr Majka<sup>z,aa,bb</sup>, Hugo Merchant<sup>p</sup>, Michael P. Milham<sup>i,v</sup>, Marcello G.P. Rosa<sup>aa,bb</sup>, Jordy Tasserie<sup>cc,dd,ee</sup>, Lynn Uhrig<sup>cc,dd</sup>, Daniel S. Margulies<sup>ff</sup>, and P. Christiaan Klink<sup>gg,\*</sup>

Figure 1

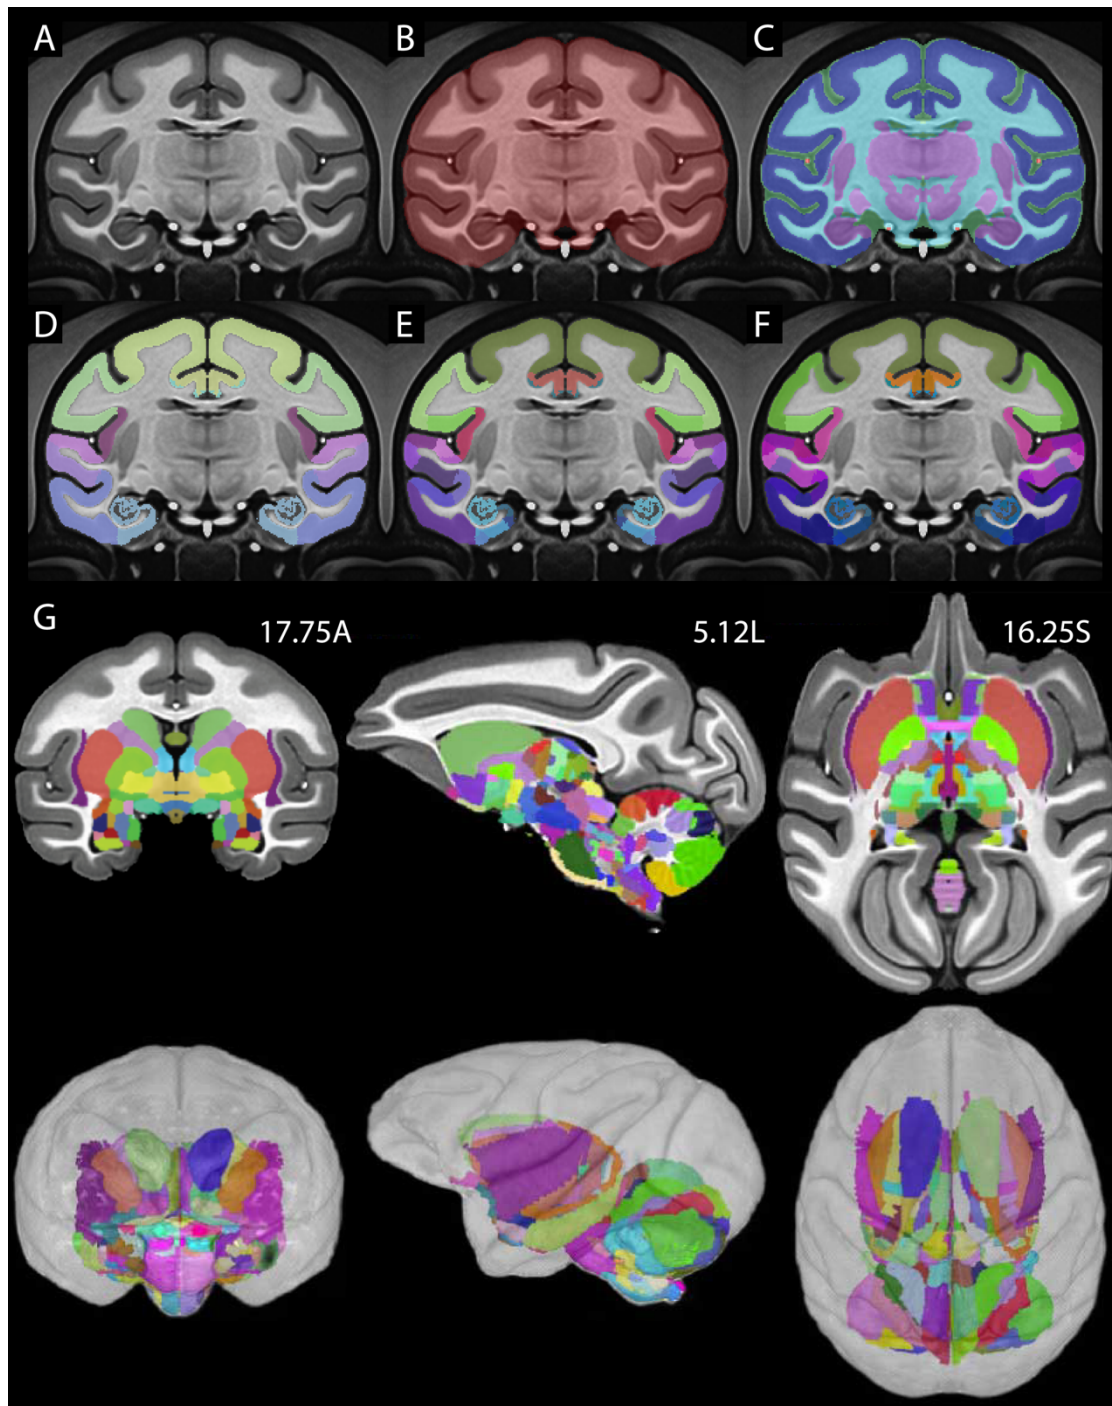

Figure 2

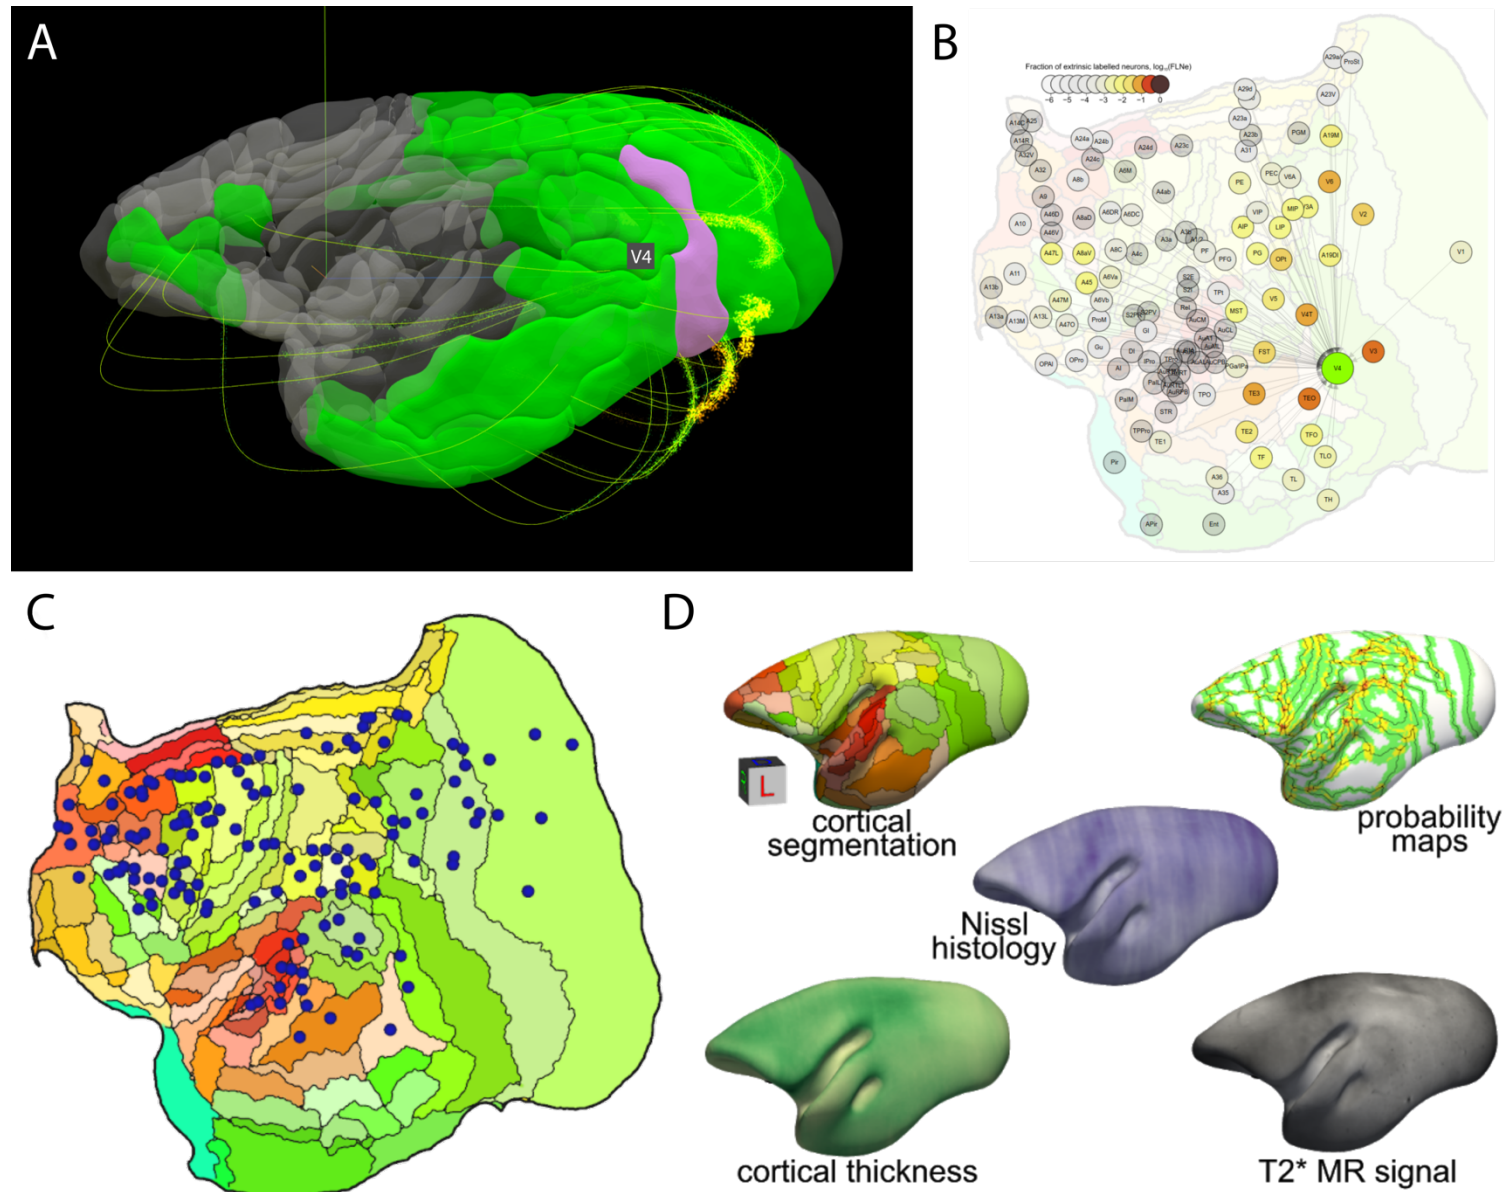

Figure 3

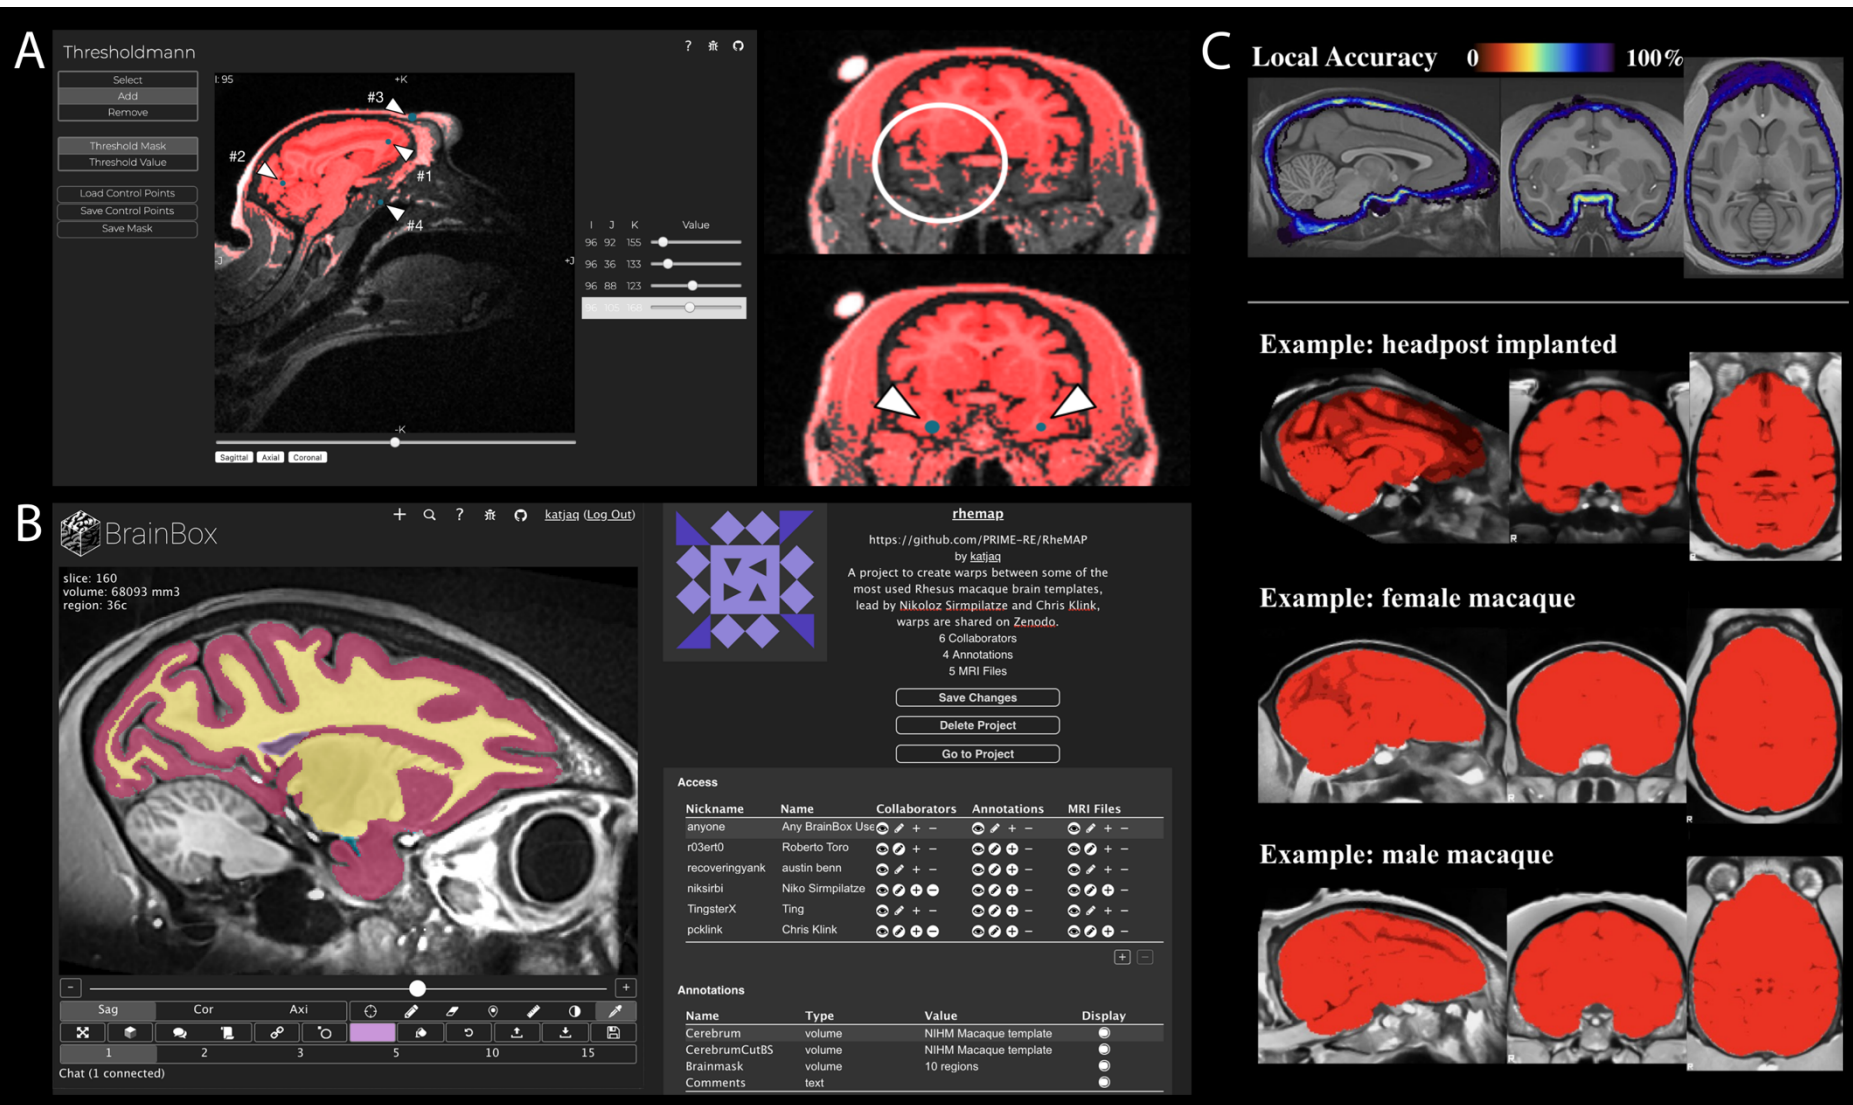

Figure 4

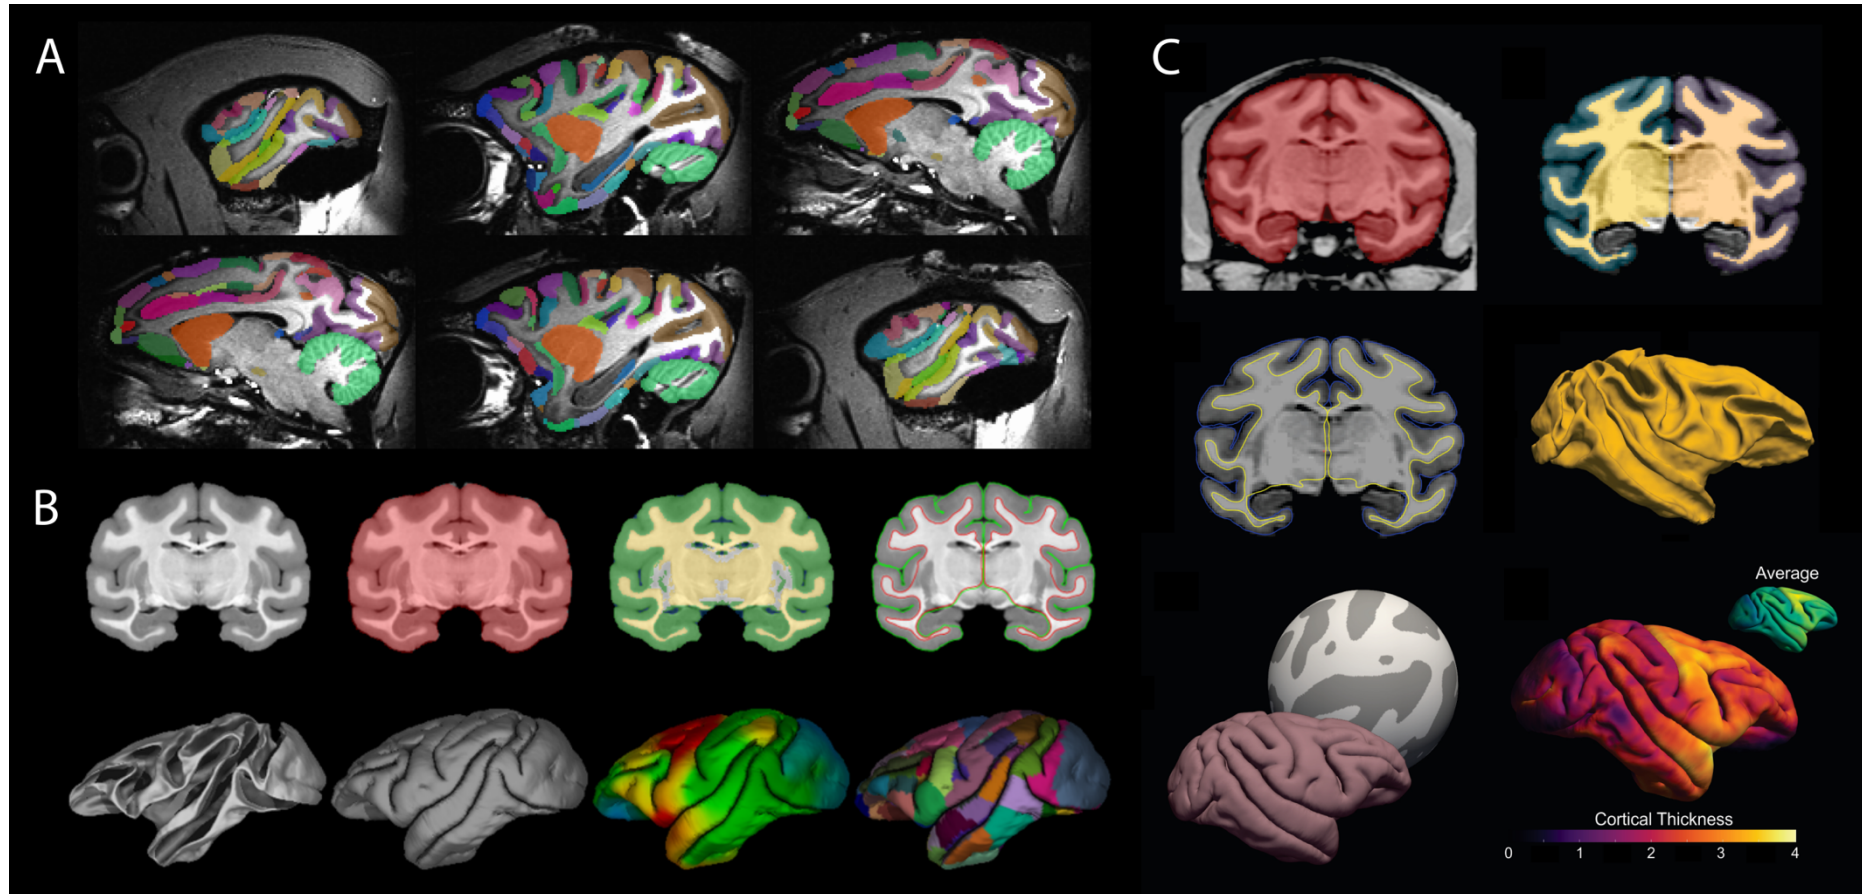



Figure 5

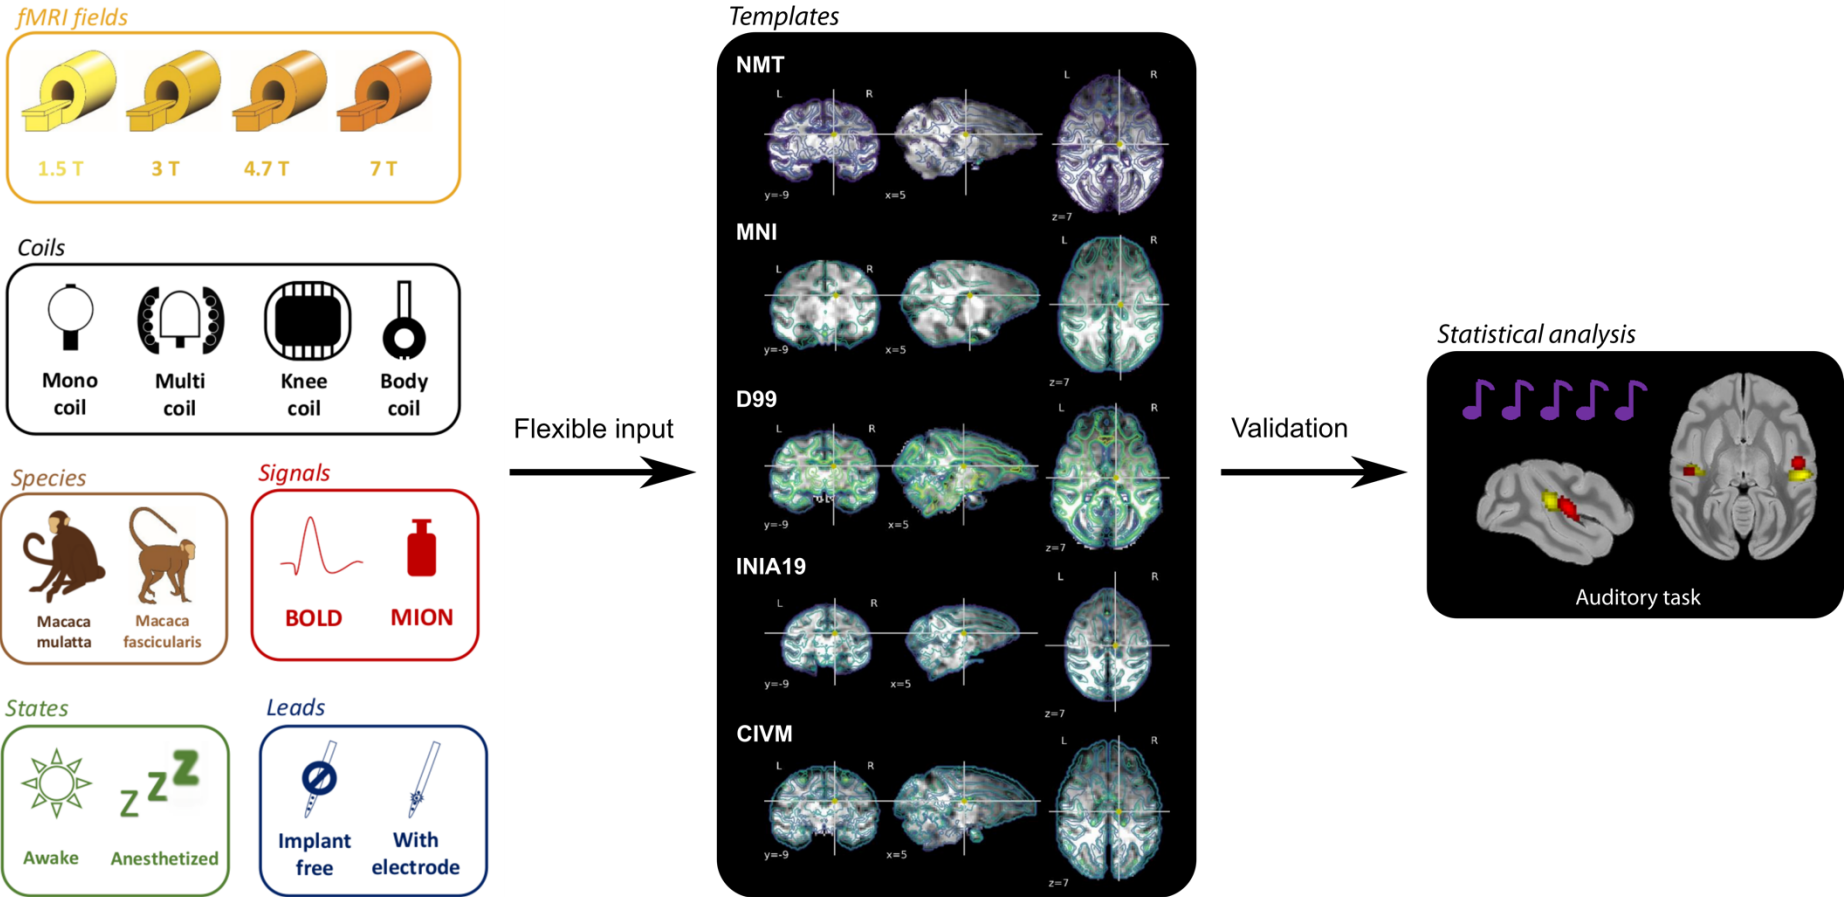

Figure 6

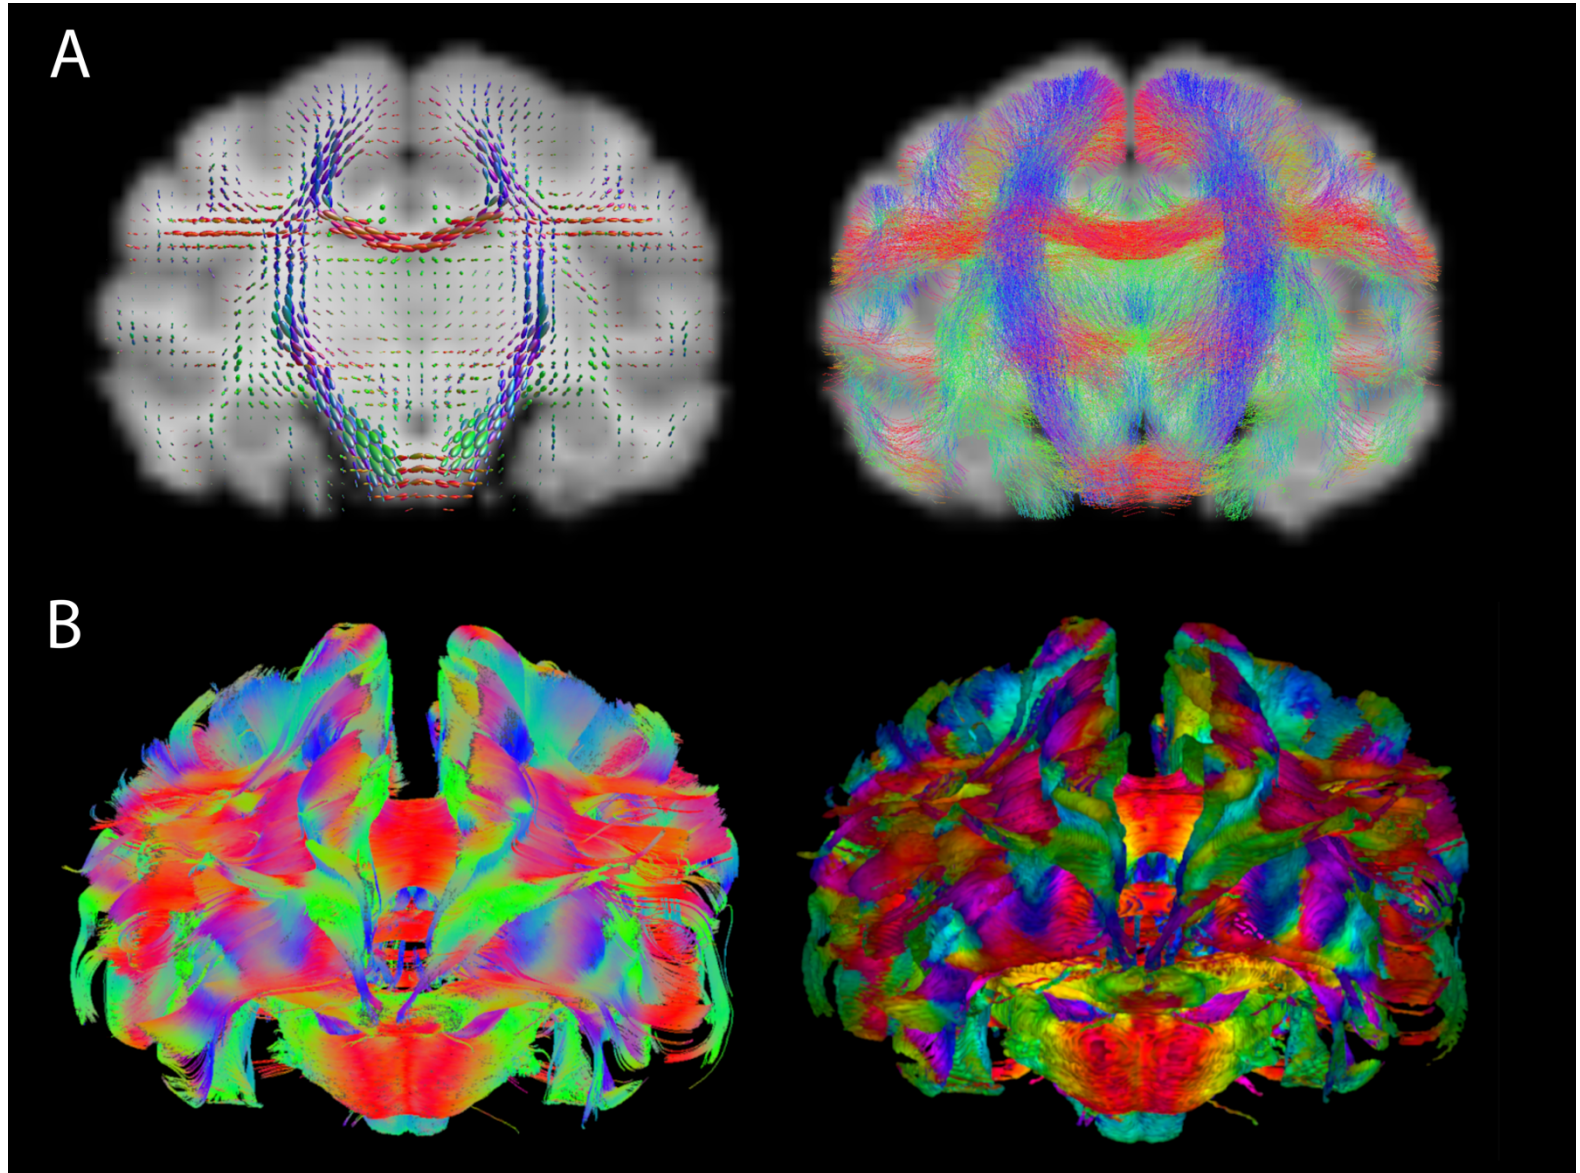

Source: https://www.biorxiv.org/content/10.1101/2020.07.31.230185v1.full.pdf
